# Supplementary material for: Zero to moderate methane emissions in a densely rooted, pristine Patagonian bog - biogeochemical controls as revealed from isotopic evidence
Source: Copernicus journal article supplement (doi:10.5194/bg-2018-301), 2018-08-28
Supplement: Supplementary file 1 [file bg-2018-301-supplement.pdf]

*Supplement of*

## **Zero to moderate methane emissions in a densely rooted, pristine Patagonian bog and their biogeochemical controls as revealed from isotopic evidence**

Wiebke Münchberger et al.

5 *Correspondence to:* Wiebke Münchberger (wiebke.muenchberger@uni-muenster.de), Klaus-Holger Knorr (kh.knorr@uni-muenster.de)

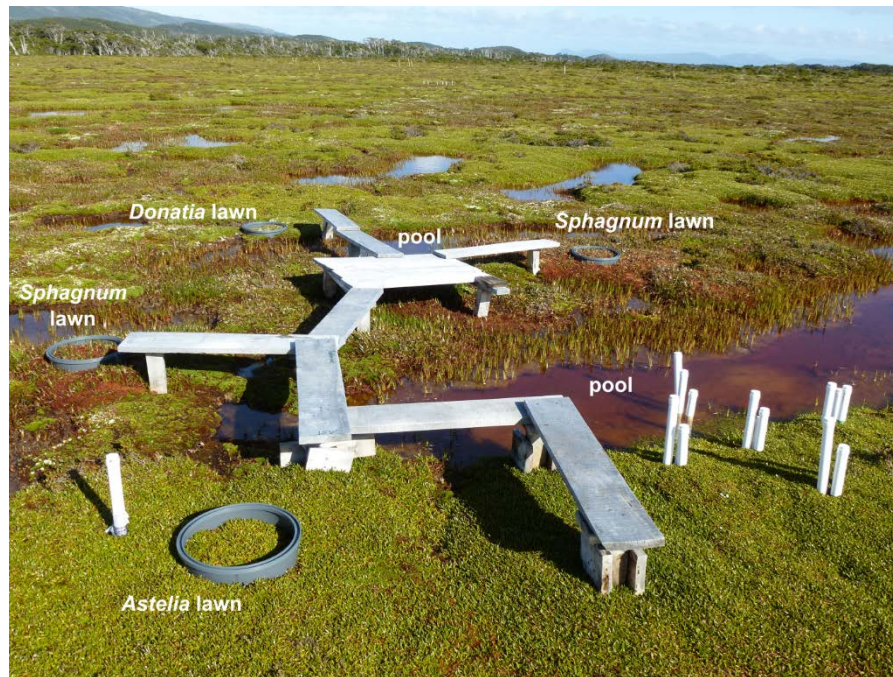

**Figure S01.** Arrangement of collars at platform 3 in the study site. Boardwalks were not installed between platforms to minimize disturbance of the cushion vegetation surface. Picture taken by Isabella Nördemann. Note the different types of microforms.

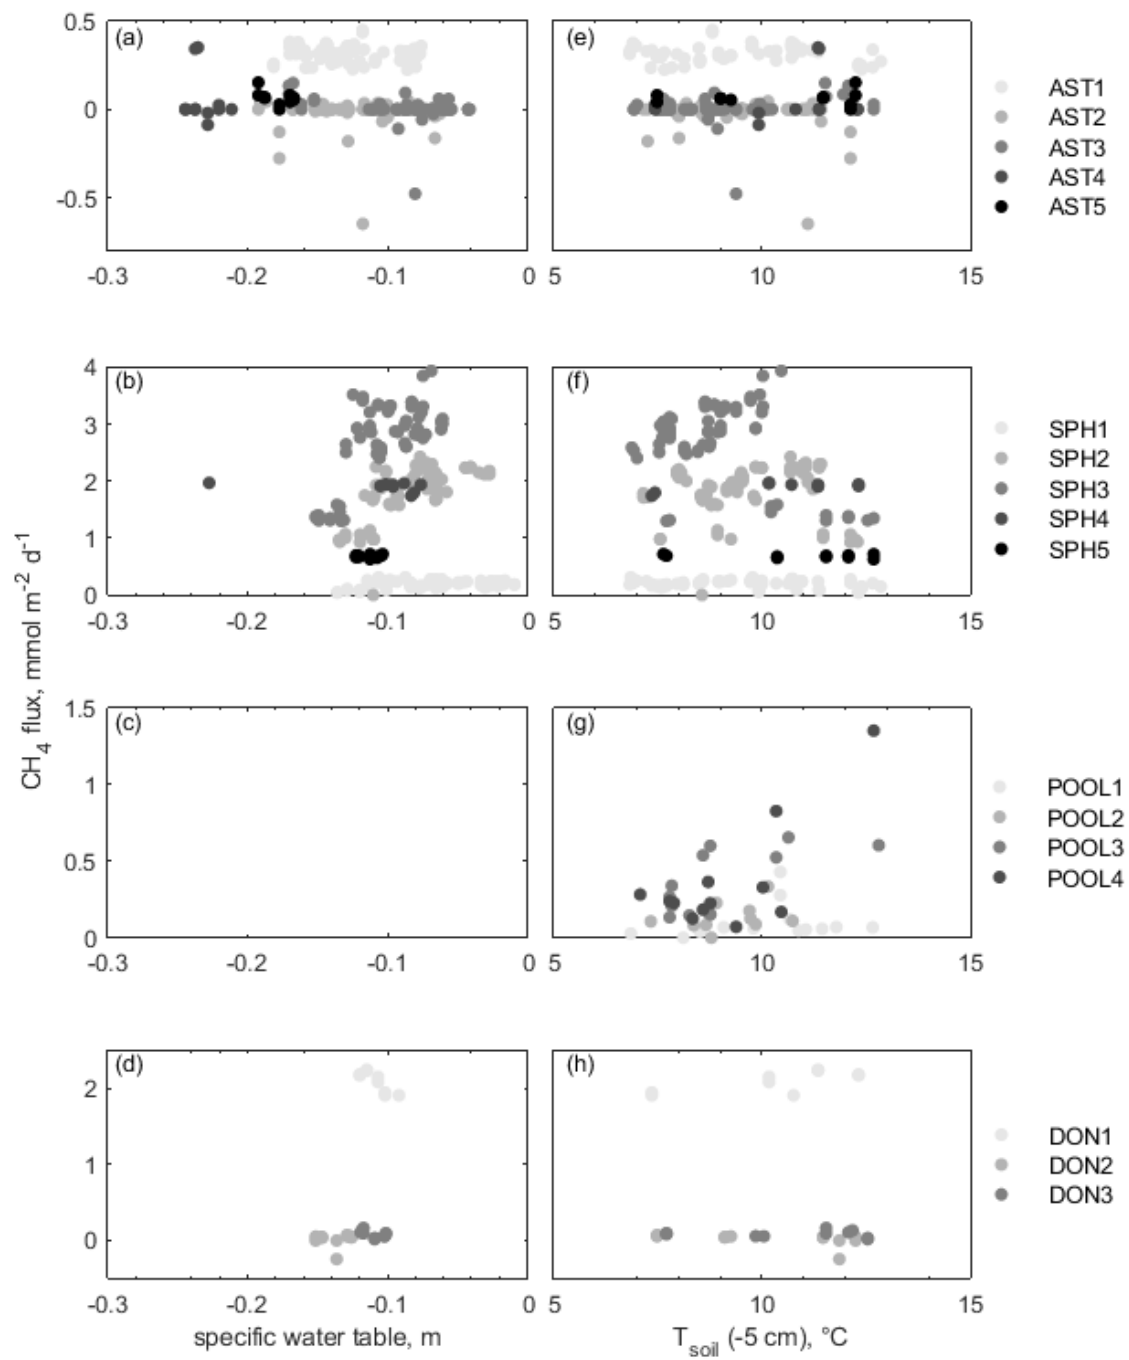

**Figure S02 a-h** CH<sub>4</sub> fluxes measured from individual collars of dominant microforms (*Astelia* lawns (a,e), *Sphagnum* lawns (b,f), pools (c,g) and *Donatia* lawns (d,h)) in a Patagonian cushion bog plotted against water table depth and soil temperature. CH<sub>4</sub> emissions were mostly decoupled from environmental controls probably since CH<sub>4</sub> fluxes were negligible in many cases. Obviously, individual collars of microforms with non-zero emissions released different amounts of CH<sub>4</sub>.

5

## **Identification of CH<sub>4</sub> production and consumption zones applying PROFILE**

### **Methods**

Zones of CH<sub>4</sub> production and consumption in the peat column were quantitatively identified by inverse modelling based on pore water profiles of CH<sub>4</sub> concentrations using the software routine PROFILE (Berg et al., 1998). Steady-state conditions as well as a dominance of diffusive gas transport over ebullient events and aerenchymatic transport would have to be assumed. Given the large root biomass, this may only partly apply to the system under study here. Therefore, the modelling approach provided only rough estimates for production and consumption zones due to the complex diffusivity in the rhizosphere of highly rooted peat. Nevertheless, diffusion coefficients for CH<sub>4</sub> were derived from Lermann (1988) and corrected for mean soil temperatures as stated above for calculation of pore water concentrations as well as porosity. Porosity  $\phi$  was calculated as (Eq. A1)

15

$$\phi = 1 - \frac{\rho_{\text{bulk}}}{\rho_{\text{particle}}}$$

where  $\rho_{\text{bulk}}$  is the bulk density (g cm<sup>-3</sup>) and  $\rho_{\text{particle}}$  the particle density (g cm<sup>-3</sup>). Particle density was assumed to be 1.5 g cm<sup>-3</sup> (Weiss et al., 1998). Below *Astelia* lawns, the porous media available for diffusion was reduced by presence of roots and porosity was calculated considering the average root biomass throughout the rhizosphere. The software input requires equal depth zones and thus data were averaged to get a 0.2 m resolution over the whole profile, if necessary. The model results were evaluated at a significance level of 0.05.

20

### **Results and discussion**

The lower rhizosphere of *Astelia* lawns was the most pronounced sink of CH<sub>4</sub>, while in the upper rhizosphere production of (small amounts) of CH<sub>4</sub> was balanced by CH<sub>4</sub> oxidation (fig. A3, a-f). Zones of CH<sub>4</sub> consumption below pools (fig. A3, g-l) roughly corresponded to zones of CH<sub>4</sub> consumption of *Astelia* lawns while near the surface net production also approached zero. These zones of CH<sub>4</sub> consumption in relatively great depths below pools support our assumption of a lateral concentration gradient distributing e.g. CH<sub>4</sub> and O<sub>2</sub> along adjacent microforms. The pool

sediment was identified as a zone of CH<sub>4</sub> production in two cases, possibly due to the availability of degradable organic matter from submerged *Sphagnum*. The near-zero diffusive CH<sub>4</sub> flux was consistent with low emission measured by chambers. Deep peat layers below those sampled would probably indicate intense CH<sub>4</sub> production.

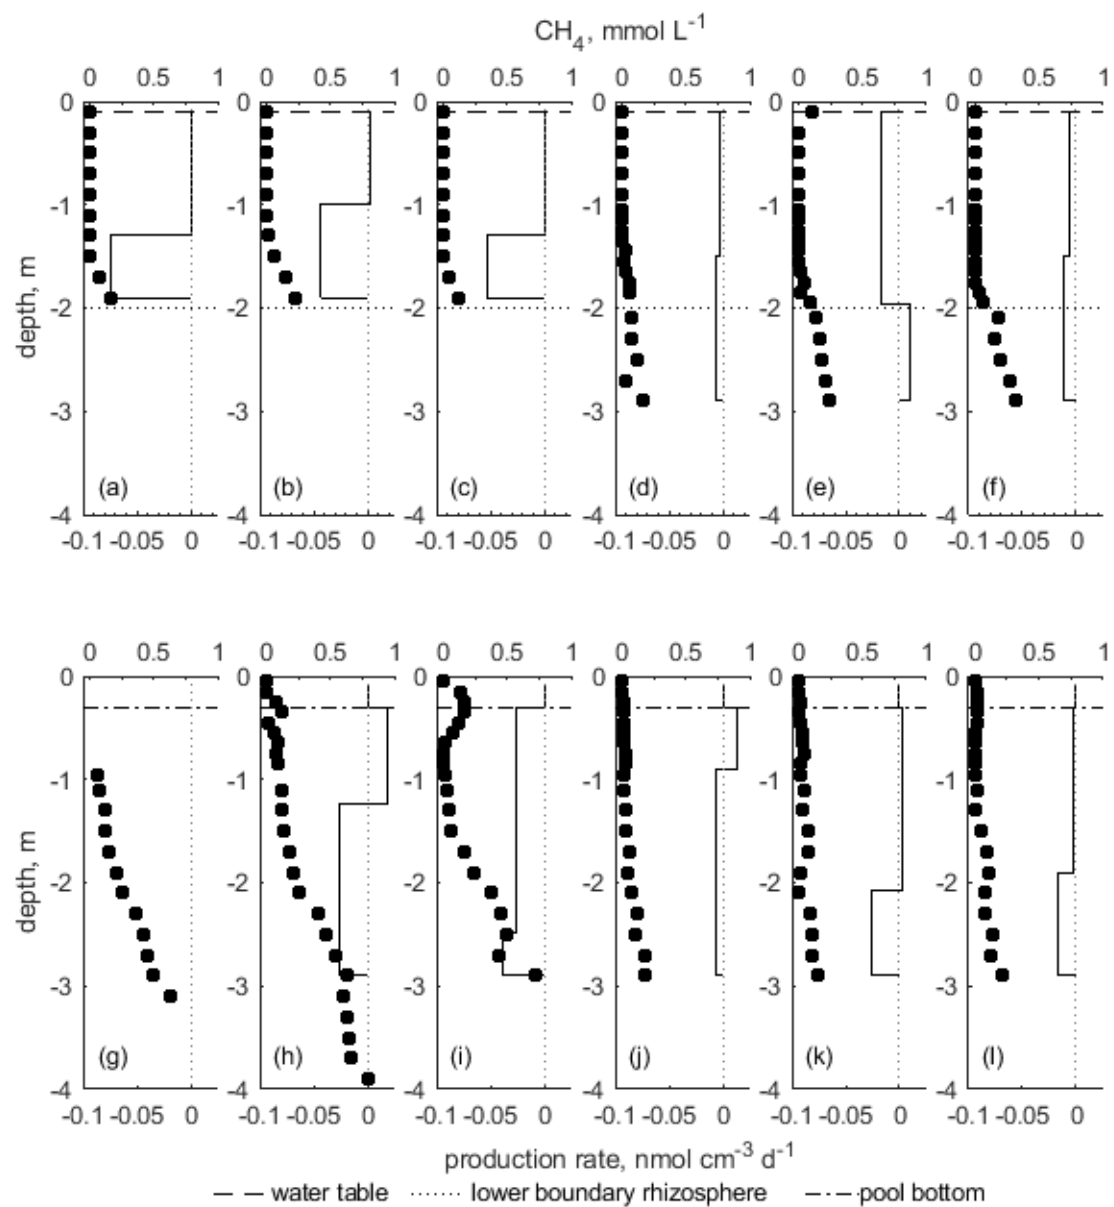

**Figure S03 a-1** CH<sub>4</sub> pore water concentration depth profiles obtained from MLPs installed in *Astelia* lawns and pools during two sampling campaigns in austral summer 2015 and 2016. Displayed depths represent the centre of a MLP segment. Note that no data were available for the upper profile of pool 1 and that modelling of production rates did not include all data obtained from pool 2 in 2015 for depth consistency. Concentrations are given per volume of pore water while production rates are given per volume of peat.

## 5 References

Berg, P., Risgaard-Petersen, N., and Rysgaard, S.: Interpretation of measured concentration profiles in sediment pore water, *Limnol Oceanogr*, 43, 1500-1510, 1998.

Lerman, A.: *Geochemical processes: water and sediment environments*, Wiley, Hoboken, N.J., USA, 492 pp., 1979.

Weiss, R., Alm, J., Laiho, R., and Laine, J.: Modeling Moisture Retention in Peat Soils, *Soil Sci Soc Am J*, 62, 305-313, 1998.
