# Supplementary material for: Zero to moderate methane emissions in a densely rooted, pristine Patagonian bog - biogeochemical controls as revealed from isotopic evidence
Source: Copernicus journal article supplement (doi:10.5194/bg-2018-301), 2018-08-28
Supplement: Supplementary file [file bg-2018-301-RC2-supplement.pdf]

# Zero to moderate methane emissions in a densely rooted, pristine Patagonian bog - biogeochemical controls as revealed from isotopic evidence

Wiebke Münchberger<sup>1, 2</sup>, Klaus-Holger Knorr<sup>1</sup>, Christian Blodau<sup>1, †</sup>, Verónica A. Pancotto<sup>3, 4</sup>, Till Kleinebecker<sup>2</sup>

<sup>1</sup>Ecohydrology and Biogeochemistry Research Group, Institute of Landscape Ecology, University of Muenster, Heisenbergstraße 2, 48149 Muenster, Germany

<sup>2</sup>Biodiversity and Ecosystem Research Group, Institute of Landscape Ecology, University of Muenster, Heisenbergstraße 2, 48149 Muenster, Germany

<sup>3</sup>Centro Austral de Investigaciones Científicas (CADIC-CONICET), B. Houssay 200, 9410 Ushuaia, Tierra del Fuego, Argentina

<sup>4</sup>Instituto de Ciencias Polares y Ambiente (ICPA-UNTDF), Fuegia Basket, 9410 Ushuaia, Tierra del Fuego, Argentina

Correspondence to: Wiebke Münchberger (wiebke.muenchberger@uni-muenster.de), Klaus-Holger Knorr (kh.knorr@uni-muenster.de)

**Abstract.** Peatlands are significant global methane (CH<sub>4</sub>) sources, but processes governing CH<sub>4</sub> dynamics have been predominantly studied on the northern hemisphere. Southern hemispheric and tropical bogs can be dominated by cushion-forming vascular plants (e.g. *Astelia pumila*, *Donatia fascicularis*). These cushion bogs are found in many (mostly southern) parts of the world but could also serve as extreme examples for densely rooted northern hemispheric bogs dominated by rushes and sedges. We report highly variable summer CH<sub>4</sub> emissions from different microforms in a Patagonian cushion bog as determined by chamber measurements. Driving biogeochemical processes were identified from pore water profiles and carbon isotopic signatures. An intensive root activity within a rhizosphere stretching over 2 m depth accompanied by molecular oxygen release created aerobic microsites in water-saturated peat leading to a thorough CH<sub>4</sub> oxidation (< 0.003 mmol L<sup>-1</sup> pore water CH<sub>4</sub>, enriched δ<sup>13</sup>C-CH<sub>4</sub> by up to 10‰) and negligible emissions (0.09 ± 0.16 mmol CH<sub>4</sub> m<sup>-2</sup> d<sup>-1</sup>) from *Astelia* lawns. Root activity even suppressed CH<sub>4</sub> emissions from non-rooted peat below adjacent pools (0.23 ± 0.25 mmol CH<sub>4</sub> m<sup>-2</sup> d<sup>-1</sup>), in which we found similar pore water profile patterns as obtained under *Astelia* lawns. Below the rhizosphere pore water concentrations increased sharply to 0.40 ± 0.25 mmol CH<sub>4</sub> L<sup>-1</sup> and CH<sub>4</sub> was predominantly produced by hydrogenotrophic methanogenesis. Few *Sphagnum* lawns and – surprisingly – one lawn dominated by cushion-forming *D. fascicularis* were found to be local CH<sub>4</sub> emission hot spots with up to 1.52 ± 1.10 mmol CH<sub>4</sub> m<sup>-2</sup> d<sup>-1</sup> presumably as root density and molecular oxygen release dropped below a certain threshold. The spatial distribution of root characteristics supposedly causing such pronounced CH<sub>4</sub> emission pattern was evaluated on a conceptual level that aimed to reflect extreme examples of general scenarios in densely rooted bogs. We conclude that presence of cushion vegetation as a proxy for negligible CH<sub>4</sub> emissions from cushion bogs needs to be interpreted with caution. Nevertheless, overall ecosystem CH<sub>4</sub> emissions at our study site were

# Summary of comments: bg-2018-301-manuscript-version1.pdf

---

Page:1

---

 Number: 1 Author: Subject: Highlight Date: 2018-09-21 11:36:39

---

How was this tested? If so, how far from root surface the "suppressive effect" is possible?

 Number: 2 Author: Subject: Highlight Date: 2018-09-21 11:38:02

---

Please, rephrase the sentence in a more simplistic way. Too difficult to read and understand.

probably minute compared to bog ecosystems worldwide and widely decoupled from environmental controls due intensive root activity of e.g. *A. pumila*.

## 1 Introduction

Peatland ecosystems are long-term carbon (C) stores as organic C in plant residues degrades only incompletely and accumulates over millennia (Gorham, 1991; Yu et al., 2012). While being C sinks, peatlands are significant natural methane (CH<sub>4</sub>) sources on the global scale responsible for about 10% of global annual CH<sub>4</sub> emissions (Aselmann and Crutzen, 1989; Mikaloff Fletcher et al., 2004). CH<sub>4</sub> has a 28-fold higher global warming potential over a 100-year time horizon compared to carbon dioxide (CO<sub>2</sub>) (IPCC, 2014) and, thus, processes governing CH<sub>4</sub> production, consumption and emissions from peatlands receive much attention to estimate global greenhouse gas emissions.

The slowdown of decomposition and accumulation of C in rainwater-fed peatlands (bogs) results from e.g. a high water table, anoxic conditions, recalcitrant peat forming litter, inactivation of oxidative enzymes and an accumulation of decomposition end-products (Beer and Blodau, 2007; Limpens et al., 2008; Bonaiuti et al., 2017). The upper, unsaturated and oxic peat layers with high decomposition rates typically extent only about few decimetres (Whalen, 2005; Limpens et al., 2008). Once methanogenic conditions are established, CH<sub>4</sub> production is mainly controlled by substrate supply of degradable organic matter (Hornibrook et al., 1997; Whalen, 2005). Produced CH<sub>4</sub> is released from peat by three main pathways: diffusion, ebullition and plant-mediated transport (Blodau, 2002; Limpens et al., 2008). During slow diffusive transport along the concentration gradient from deep anoxic peat layers to the atmosphere, CH<sub>4</sub> might get trapped within upper, oxic zones and consumed by methanotrophic microbes (Chasar et al., 2000; Whalen, 2005; Berger et al., 2018). Consequently, water table position and fluctuations that determine the extent of oxic zones strongly control the amount of emitted CH<sub>4</sub> (Blodau and Moore, 2003; Whalen, 2005). While CH<sub>4</sub> oxidation by methanotrophs results in suppressed CH<sub>4</sub> emissions, ebullition by fast release of gas bubbles can substantially increase CH<sub>4</sub> emissions (Fechner-Levy and Hemond, 1996; Whalen, 2005; Knoblauch et al., 2015; Burger et al., 2016). Many wetland plants establish aerenchymatic root tissues to supply roots growing in anoxic peat with molecular oxygen (O<sub>2</sub>) (Joabsson et al., 1999; Colmer, 2003). Yet, these aerenchymatic roots have frequently been described to act as conduits to the atmosphere for CH<sub>4</sub> transport bypassing oxic surface layers thereby preventing CH<sub>4</sub> oxidation and enhancing emissions (e.g. Joabsson et al., 1999 and references therein; Chasar et al., 2000; Colmer, 2003, Whalen, 2005, Knoblauch et al., 2015; Berger et al., 2018). Vegetated or open water pools that are characteristic of peatlands have received less attention than the vegetated surfaces (Pelletier et al., 2014). However, pools are considered as strong CH<sub>4</sub> emitters due to their anoxic conditions (Hamilton et al., 1994; Blodau 2002; Burger et al., 2016) that can even turn the peatlands' C balance into a source (Pelletier et al., 2014) but examples of low emission pools have been also reported (Knoblauch et al., 2015).

Carbon isotopic signatures are a valuable tool for identifying mechanisms and pathways of CH<sub>4</sub> production and consumption. Carbon isotopic signatures in pore water of northern hemispheric bogs (hereafter termed northern bogs) vary typically between -80 to -50‰ and -25 to -0‰ for CH<sub>4</sub> and CO<sub>2</sub>, respectively (e.g. Whiticar et al., 1986; Hornibrook et al., 1997; Chasar et al., 2000; Hornibrook et al., 2000; Beer et al., 2008; Steinmann et al., 2008; Corbett et al., 2013). Depending on the available

---

 Number: 1 Author: Subject: Highlight Date: 2018-09-21 11:58:34

Please, check whether this value is still relevant. There is no recent reference cited.

---

 Number: 2 Author: Subject: Replace Date: 2018-09-21 11:56:07

28-fold

---

 Number: 3 Author: Subject: Highlight Date: 2018-09-21 12:04:39

What about low temperatures? I am not sure bogs do exist in tropics (excluding mountain regions).

---

 Number: 4 Author: Subject: Highlight Date: 2018-09-21 12:12:15

This is not clear: is this prerequisite for the oxidation? Not trapped=not oxidized? If so, how exactly could CH<sub>4</sub> be trapped and how does CH<sub>4</sub> oxidation occur in e.g. rice paddies?

---

 Number: 5 Author: Subject: Insert Text Date: 2018-09-21 12:14:51

(delta 13C)

---

 Number: 6 Author: Subject: Highlight Date: 2018-09-21 12:18:03

Actually, values could go even to positive range.

---

substrate for methanogenesis, it was mostly observed that either the acetoclastic or hydrogenotrophic pathway predominates, resulting in distinctive carbon isotope signatures of CH<sub>4</sub> (acetate fermentation  $\delta^{13}\text{C-CH}_4 \sim -65$  to  $-50\%$ , CO<sub>2</sub> reduction  $\delta^{13}\text{C-CH}_4 \sim -110$  to  $-60\%$ ) (Whiticar et al., 1986). Methane is prevalingly produced by acetoclastic methanogenesis when fresh, labile organic matter is available whereas the production pathway shifts towards hydrogenotrophic methanogenesis when organic matter becomes increasingly recalcitrant (Hornibrook et al., 1997; Popp et al., 1999; Chasar et al., 2000; Conrad, 2005). A predominance of the latter pathway is indicated by strong fractionation between <sup>12</sup>C/<sup>13</sup>C resulting in relatively depleted  $\delta^{13}\text{C-CH}_4$  corresponding to a fractionation factor  $\alpha_c$  between 1.055 and 1.090 (Whiticar et al., 1986) and a  $\delta^{13}\text{C-CH}_4$  isotopic signature following that of  $\delta^{13}\text{C-CO}_2$  (Hornibrook et al., 2000). Subsequent methanotrophy alters the isotopic signature of CH<sub>4</sub> by discriminating against <sup>13</sup>C and the residual CH<sub>4</sub> remains enriched while produced CO<sub>2</sub> becomes depleted in <sup>13</sup>C (Chasar et al., 2000; Popp et al., 1999). As both, acetoclastic methanogenesis and methanotrophy, result in a  $\delta^{13}\text{C-CH}_4$  signature enriched in <sup>13</sup>C and a small apparent fractionation factor (Whiticar et al., 1986; Conrad, 2005), the acetoclastic pathway cannot be clearly separated from methanotrophic conditions based on carbon isotopes only (Conrad, 2005).

The majority of studies elucidating mechanisms governing CH<sub>4</sub> production, consumption and emission have been conducted in peatlands on the northern hemisphere (e.g. Blodau, 2002; Limpens et al., 2008; Yu 2012 and references in these), whereas only little research deals with CH<sub>4</sub> emissions and their underlying controls in bogs on the southern hemisphere (hereafter termed southern bogs) (Broder et al., 2015). Contrary to those northern bogs, southern bogs are not only dominated by *Sphagnum* mosses, dwarf shrubs or few graminoids such as the rush-like species *Tetroncium magellanicum*, but also by vascular plants (Kleinebecker et al., 2007) that can densely root upper peat layers (Fritz et al., 2011, Knorr et al., 2015). These vascular plants, for instance of the genus *Astelia* (Asteliaceae), *Donatia* (Stylidiaceae) or *Oreobolus* (Cyperaceae), independently developed a cushion life form to protect from harsh climate in cold environments (Gibson and Kirkpatrick, 1985; Boucher et al., 2016). Bogs dominated by cushion-forming vascular plants (hereafter termed cushion bogs) can be found in many (mostly southern) parts of the world, for instance all along the high Andes (Coombes and Ramsay, 2001; Benavides et al., 2013; Fonkén, 2014) down to southernmost Patagonia (Ruthsatz and Villagran, 1991; Heusser, 1995; Kleinebecker et al., 2007; Grootjans et al., 2014), in highlands of eastern Africa (Dullo et al., 2017) as well as in New Guinea (Hope, 2014), New Zealand and Tasmania (Gibson and Kirkpatrick, 1985; Ruthsatz and Villagran, 1991) and some sub-Antarctic islands (Ruthsatz and Villagran, 1991). These cushion bogs could also be regarded as extreme examples for densely rooted northern bogs that are dominated by rushes and sedges.

To our knowledge, only two studies reported CH<sub>4</sub> emissions from southern vascular-plant dominated bogs with quite inconsistent results. Over a New Zealand bog dominated by the evergreen “wire rush” *Empodisma robustum*, CH<sub>4</sub> emissions exceeded those commonly reported from northern bogs (Goodrich et al., 2015), while emissions from a Patagonian cushion bog dominated by *Astelia pumila* were negligible (Fritz et al., 2011). Both, high and negligible CH<sub>4</sub> emissions, were mainly explained by the extensive aerenchymous roots of the prevailing plant species: The aerenchyma might function as a conduit for CH<sub>4</sub> from deep peat layers to the atmosphere in the first case, whereas in the second case pronounced O<sub>2</sub> supply by roots might have resulted in a thorough oxidation of pore water CH<sub>4</sub>. Despite the variety of bogs dominated by densely rooted,

No Comments.

aerenchymous plants on the northern and southern hemisphere, there is some evidence from latest research that very low CH<sub>4</sub> pore water concentrations could be a more common phenomenon in those ecosystems (Dullo et al., 2017; Agethen et al., 2017; Knorr et al., 2015). In general, promotion or suppression of CH<sub>4</sub> production should be determined by the ratio of root density and activity associated with O<sub>2</sub> release versus presence of labile root organic matter or exudates accompanied with O<sub>2</sub> consumption (Blodau, 2002; Agethen et al., 2017).

Fritz et al. (2011) were the first to investigate the CH<sub>4</sub> biogeochemistry below *Astelia* lawns of a Patagonian cushion bog and found emissions to be decoupled from the water table position because of considerable O<sub>2</sub> release by roots. This resulted in enhanced organic matter decomposition, oxidation of almost all CH<sub>4</sub> produced in deep peat layers and, thus, near-zero emissions. However, CH<sub>4</sub> emissions were determined only sporadically and not all predominant microforms and plant communities were considered, restricting general conclusions about CH<sub>4</sub> emissions from this type of ecosystem. Furthermore, more knowledge on biogeochemical processes throughout the peat column of *Astelia* lawns and other microforms is needed to extent our limited understanding of these first insights into CH<sub>4</sub> dynamics in cushion bogs.

Here, we quantified austral summer CH<sub>4</sub> emissions from dominant microforms in a Patagonian cushion bog and examined possible environmental and biogeochemical controls. We hypothesized that (I) emissions from cushion plant vegetation dominated by *Astelia pumila* or *Donatia fascicularis* are negligible while pools and *Sphagnum* lawns emit CH<sub>4</sub> in considerable amounts, and that (II) carbon isotopic signatures obtained from pore water below *Astelia* lawns reflect a distinct CH<sub>4</sub> oxidation effect whereas pore water composition in non-rooted peat below pools remains less affected<sup>1</sup> and that (III) besides by methanotrophy, isotopic composition of pore water CH<sub>4</sub> could also be affected by a predominance of acetate fermentation throughout the rhizosphere of *Astelia* lawns shifting towards CO<sub>2</sub> reduction with peat depth and in non-rooted peat below<sup>2</sup> pools. Biogeochemical controls of CH<sub>4</sub> emissions from *Sphagnum* lawns were not subject of this study, as they have been intensively studied in northern bogs (e.g. Hornibrook et al., 1997; Beer and Blodau, 2007; Steinmann et al., 2008; Corbett et al., 2013) and even southern bogs with mixed vegetation in absence of notable cushion plant coverage (Broder et al., 2015).

## 2 Material and Methods

### 2.1 Description of the study site

The study was conducted at a cushion bog on the Peninsula Mitre in southernmost Patagonia, Tierra del Fuego (Moat, 54°58'S, 66°44'W, Fig. 1). Peatlands of the Peninsula Mitre provide the nowadays rare opportunity to study carbon dynamics under pristine conditions as they can be considered as largely undisturbed by human activities such as drainage, agriculture or elevated atmospheric nitrogen deposition (Kleinebecker et al., 2008; Fritz et al., 2011; Grootjans et al., 2014; Paredes et al., 2014). About 45% of this area are covered by peatlands (Iturraspe, 2012) while little is known about these ecosystems because of their poor accessibility (Iturraspe, 2012). The study site at Moat belongs to a complex system of sloping mires, blanket bogs, fens and – in coastal areas - cushion bogs (Iturraspe, 2012; Borromei et al., 2014). The studied cushion bog is located in

---

 Number: 1 Author: Subject: Highlight Date: 2018-09-21 12:27:52

---

Not clear. Do authors mean, reflect the signal of methanogenesis type? Please, rephrase.

 Number: 2 Author: Subject: Highlight Date: 2018-09-21 12:34:42

---

How is this known? From the introduction above, it is not clear the pools are without (vascular) vegetation. Northern pools often contain aerenchimatous plants of different species compared to lawns and hummocks, or at least Sphagnum. Please, clarify above.

 Number: 3 Author: Subject: Note Date: 2018-09-21 12:41:34

---

I find the Introduction a bit too extended, especially regarding the common knowledge about methane in the very beginning and peatlands in general. Authors could immediately start the story of the importance of southern peatlands and have the necessary information on peatlands' biochemistry and vegetation specialty in there. Then the information on the isotope issue would be sufficient to formulate hypotheses without any loss of logic.



exposed proximity to the Beagle channel with harsh winds (Grootjans et al., 2014) resulting in an oceanic climate with average daily temperatures of 6°C and annual precipitation of 500 mm (Fritz, 2012).

Large areas of the cushion bogs in Moat are covered by the cushion-forming plants *Astelia pumila* and *Donatia fascicularis*.

The vegetation of the studied bog was composed of a mosaic of different plant communities characterized by specific plant species with lawns of *A. pumila* being the prevailing microform. Sparsely vegetated pools of different size (< 0.5 m<sup>2</sup> - ~10 m<sup>2</sup>) and ~0.5 m depth were embedded in these *Astelia* lawns. *Sphagnum magellanicum* or *D. fascicularis* grew in small lawns (patches of few square meters) in close vicinity to the pools which we assume to provide protection against desiccation for *S. magellanicum*. *Tetroncium magellanicum*, a rush-like herb that does not form cushions but presumably establishes aerenchymous roots as it tolerates inundation (von Mehring, 2013), was associated predominantly with *Sphagnum* lawns but also with *Astelia* or *Donatia* lawns. Peat formation started ~11000 years ago (Borromei et al., 2014), and previously, the bog was dominated by *S. magellanicum* while *A. pumila* invaded the area around 2600 years before present as determined by pollen analyses (Heusser, 1995). The peat below *Astelia* lawns was densely rooted with on the average 2.15 g DW L<sup>-1</sup> down to 1.7 m (Fritz et al., 2011). Mean root lifetimes of *A. pumila* has been estimated to be ~3-4 years indicating a high root turnover (Knorr et al., 2015).

## 2.2 Sampling and analysis of solid peat and root biomass

Peat coring in *Astelia* and *Sphagnum* lawns (data not shown) was done using a Russian peat corer (Eijkelpkamp Agrisearch Equipment, Giesbeek, the Netherlands) down to a maximum depth of 7.5 m in *Astelia* lawns. Roots of *A. pumila* in *Astelia* lawn cores were sorted out and treated separately. The density of *D. fascicularis* root biomass was determined by cutting three 0.1 x 0.1 m sods down to a depth of 0.4 m. Peat and root biomass samples were oven dried at 70°C until constant weight to calculate peat bulk density and porosity as well as *D. fascicularis* root density. Total C and N contents together with abundance of <sup>15</sup>N and <sup>13</sup>C in the solid peat were determined using an elemental analyser (EA 3000, EuroVector, Redavalle, Italy) connected to an isotope ratio mass spectrometer (IRMS, NU instruments, Wrexham, UK).

## 2.3 Environmental variables

Environmental variables were determined during two measurement campaigns in 2015 and 2016 at half-hourly intervals. Photosynthetic active radiation (PAR, HOBO S-LIA-M003, Onset, USA, up to 2500 μmol m<sup>-2</sup> s<sup>-1</sup>) and air temperature (HOBO S-TMB-M0x, Onset, USA) were recorded by a weather station (HOBO U30 NRC, Onset, USA) in both years during austral summer months. Water table fluctuations at two replicate sites in *Astelia* lawns (Levellogger Edge 3001 and Barologger Edge, Solinst, Canada; both installed in perforated PVC tubes) and soil temperature in four depths of 0.05, 0.1, 0.3 and 0.5 m (HOBO TMCx-HD and HOBO U-12-008, Onset, USA) were measured continuously.

---

 Number: 1 Author: Subject: Highlight Date: 2018-09-21 12:55:33

Not any more? Should it be in Present Tense as the previous sentence?

---

 Number: 2 Author: Subject: Highlight Date: 2018-09-21 12:58:22

Does this mean pools were nevertheless vegetated? If so, which species dominated? What was the bottom of such pools?

---

 Number: 3 Author: Subject: Highlight Date: 2018-09-21 12:55:34

---

 Number: 4 Author: Subject: Highlight Date: 2018-09-21 15:58:24

Liter of what, peat? For peat, could you provide other volumetric dimensions, e.g. dm<sup>-3</sup>?

---

## 2.4 Chamber measurements and analyses of soil-atmosphere CH<sub>4</sub> fluxes

### 2.4.1 Field measurements

The closed chamber technique was used to determine CH<sub>4</sub> fluxes during two measurement campaigns in austral summer from December 2014 to March 2015 and in February and March 2016. One week prior to measurements, PVC collars with a height of 0.2 m were permanently installed ~0.15 m into the peat of the dominant microforms characterized by a specific plant species and a particular plant community (*Astelia* lawns: 2015 N = 3, 2016 N = 5; *Sphagnum* lawns: 2015 N = 3, 2016 N = 5; *Donatia* lawns: 2016 N = 3). The exact installation depth and the micro-relief of the surface within each collar was determined repeatedly to calculate the exact headspace volume for CH<sub>4</sub> flux estimation. The collars were equally arranged around three wooden platforms constructed in January 2014 to minimize disturbance during measurements and distributed over the study site to account for spatial variability. Different numbers of replicates between the two campaigns and the different microforms are the result of logistical constraints.

A cylindrical, transparent chamber with a basal area of 0.13 m<sup>2</sup> and a height of 0.4 m was used for soil-atmosphere flux measurements. The chamber was equipped with a fan to ensure mixing of the headspace air, a PAR sensor (HOBO S-LIA-M003, Onset, USA) and a temperature sensor (HOBO S-TMB-M0x, Onset, USA). A second temperature sensor recorded ambient temperature (HOBO S-TMB-M0x, Onset, USA) and all sensor data were logged in 1s-intervals to a data logger (HOBO U30 NRC, Onset, USA). This set-up allowed us to control air temperature inside the chamber within approximately 3°C deviation of the ambient air temperature. If necessary, ice packs were installed inside the chamber to avoid temperature increase. Due to strong wind conditions we decided against the installation of a vent tube. An opening in the top of the chamber avoided overpressure during chamber placement. This opening was closed immediately after the chamber was gently placed on a collar for at least 3 minutes to conduct measurements. Collars were equipped with a water-filled rim to ensure a gas-tight seal between chamber and collar during measurements. Pool fluxes were performed with a floating chamber of identical dimension and design on four pools located at each platform. The chamber wall extended approximately 0.04 m into the water during measurements.

All measurements were performed under a broad range of irradiance between 7:00 am to 22:00 pm (local time) to determine diurnal variations in CH<sub>4</sub> fluxes. At least once during each sampling period of two to three consecutive days, all selected microforms and pools were measured under dark conditions. Opaque, reflective material was used to cover the chamber for dark conditions. Measurements were taken every two weeks during the first campaign in 2015 (N = 405 measurements) and during two occasions in 2016 (N = 132 measurements). A more regular measurement routine throughout the whole season was constrained by harsh weather conditions and the remoteness of our study site.

The chamber was connected by a 2 mm inner diameter polyethylene tubing to a gas analyser (Los Gatos Ultraportable Greenhouse Gas Analyser 915-001, Los Gatos Research) to record the increase of CH<sub>4</sub> concentrations over time at a rate of 1 hz. Between measurements, atmospheric background concentrations were achieved inside the chamber. The gas analyser was

No Comments.

equipped with an external pump providing a flow rate of  $2 \text{ L min}^{-1}$  and pumping the analysed gas back to chamber creating a closed system. Prior to each campaign, the instrument was recalibrated.

We estimated the cover of plant species within each collar to the nearest 5% and counted the number of *T. magellanicum* shoots to further characterize the different microforms (Table 1). In 2015, vegetation surveys were conducted at the beginning and at the end of the measurement campaign. Since no change in vegetation was observed, surveys were conducted only once during the campaign in 2016. For each collar, the position above the water table was determined once during each sampling period of consecutive days to account for different positions in the micro-relief and to determine a specific water table position. Additionally, we determined the area of each individual microform patch in which a collar had been installed.

#### 2.4.2 CH<sub>4</sub> flux calculation and statistical analyses

- 10 Soil-atmosphere CH<sub>4</sub> fluxes were calculated from the gas concentration increase over time within the chamber using the software package (MATLAB Release R2015a) routine described in Eckhardt and Kutzbach (2016) and Kutzbach et al. (2007). Gas concentration was modelled either as a linear or an exponential function of time. Models performance was compared using Akaike's Information Criterion (AIC) as a measure of goodness-of-fit. This routine resulted in 90% of cases in a linear function of time (N = 485) and in 10% of cases in an exponential function of time (N = 52).
- 15 We visually inspected all concentration increases over time and none of the measurements showed a stepwise concentration increase indicative of ebullient events. **Of the 3 minutes measurement time,** 50 - 180 s (mostly around 90 s) were selected for the CH<sub>4</sub> flux calculation to exclude unstable conditions due to e.g. chamber placement particularly at the beginning of the measurement. Fluxes with a slope not significantly different from 0 (tested with an F-Test,  $p > 0.05$ ) were set to zero (20% of cases, N = 105).
- 20 Normal distributions of CH<sub>4</sub> flux datasets were checked by a Kolmogorov-Smirnov test. Due to non-normality, the Kruskal-Wallis analysis of variance followed by multiple comparison U-tests adjusted by the Bonferroni method were applied to determine significant differences between CH<sub>4</sub> fluxes of different microforms and collars. The relationships between CH<sub>4</sub> fluxes and environmental variables (soil temperature, water table depth fluctuations) as well as additional features of individual collars were evaluated by Spearman's rank correlation (Table 2). A response of CH<sub>4</sub> emissions to the investigated environmental variables was identified only for a few individual collars. Therefore, no seasonal or annual ecosystem emissions were calculated. Statistical analyses were performed using Matlab (MATLAB Statistics Toolbox Release R2017a). All flux data were reported as mean  $\pm$  standard deviation.

### 2.5 Depth profiles of peat pore water concentrations

#### 2.5.1 Sampling and field measurements

- 30 Multilevel piezometers (MLP), as described in Beer and Blodau (2007), were installed during both measurement campaigns in austral summer 2015 and 2016 to determine pore water concentrations in depth profiles. The MLPs provided a spatial

This could be too short time for CH<sub>4</sub> flux measurement especially if outside temperatures were relatively low. How was it determined? Could zero fluxes be the reason of short exposure time?

sampling resolution of either 0.1 or 0.2 m and were equipped with diffusive equilibration samplers made of permeable silicon tubes providing 4 mL gas sample volume together with a 5 mL crimp-vial filled with deionized water and covered with a permeable membrane (Supor-200 0.2  $\mu$ , Pall corporation, Pall life sciences). To collect gas samples, MLPs were stepwise retrieved, the gas volume extracted from the equilibration sampler with a 3 mL syringe, transferred into nitrogen-flushed 5 mL crimp vials capped with a butyl stopper with an aluminium crimp seal. MLPs were installed in *Astelia* lawns and pools in three replicates at each platform where closed chamber measurements were performed.

In January 2015, MLPs were installed in *Astelia* lawns (0.2 m resolution, 2 m depth) and pools (0.1 m resolution 0-1 m, 0.2 m resolution below down to a maximum depth of 4 m) for five weeks equilibration time. From gas samples pore water concentrations of CH<sub>4</sub>, dissolved inorganic carbon (DIC) and hydrogen (H<sub>2</sub>) were determined. To measure sulfate concentrations, a potential electron acceptor originating from sea spray and affecting competitiveness of methanogenesis (Broder et al., 2015), a pore water subsample obtained from each crimp-vial was transferred to a storage vial and stored frozen until analysis. An aliquot of each remaining pore water sample was measured in-situ with a pH/EC-meter (Combo HI 98129/130, Hannah instruments, Germany).

In January 2016, MLPs were installed to a depth of 3 m in pools (resolution as in 2015) for three weeks equilibration time and afterwards again in *Astelia* lawns (0.1 m resolution in transition zone from rooted to non-rooted peat in 1-2 m depth) for nine weeks of equilibration time. In 2016, equilibration samplers were used to collect CH<sub>4</sub> and CO<sub>2</sub> samples and determine their carbon stable isotopic signatures. Pore water samples obtained from crimp-vials were used to measure O<sub>2</sub> concentrations in-situ with a planar trace oxygen minisensor (Fibox 3, Presens, Germany).

### 2.5.2 Analytical procedures

Gas samples were transported to Germany and analysed within four weeks. Gaseous CH<sub>4</sub> and CO<sub>2</sub> concentrations were measured with a gas chromatograph (8610C, SRI Instruments, USA) equipped with a methaniser and flame ionization detector (FID). Hydrogen concentrations were analysed on a H<sub>2</sub>-Analyzer (Ametek TA 3000 H<sub>2</sub> Analyser, Trace Analytical TA 3000r). Sulfate concentrations were obtained by ion chromatography (883 Basic IC plus, Metrohm, Herisau, Switzerland).

Stable carbon isotopic signatures of CH<sub>4</sub> and CO<sub>2</sub> were simultaneously determined by Cavity Ringdown Spectroscopy (CRDS; Picarro G2201-i, Picarro Inc., USA). The instrument was calibrated in the beginning of every measurement day using two working standards of CH<sub>4</sub> (1000 ppm, -42.48‰) and CO<sub>2</sub> (1000 ppm, -31.07‰). Isotopic signatures are given in  $\delta$ -notation relative to Vienna Pee Dee belemnite (VPDB). As samples were stored for several weeks and  $\delta^{13}\text{C-CO}_2$  values were biased in case of high CH<sub>4</sub> concentrations in the sample, a correction procedure was applied following Berger et al. (2018).

### 2.5.3 Calculations and statistical analyses

Pore water concentrations of CH<sub>4</sub>, dissolved organic carbon (DIC) and H<sub>2</sub> were re-calculated from gaseous concentrations obtained from equilibration samplers by applying Henry's law following Eq. (1):

---

 Number: 1 Author: Subject: Insert Text Date: 2018-09-21 16:23:36

---

was

 Number: 2 Author: Subject: Highlight Date: 2018-09-21 16:33:55

---

How? What was the volume of the sample? 3 ml? For such small volumes a separate device (Small volume unit) is necessary. Please, explain.

 Number: 3 Author: Subject: Highlight Date: 2018-09-21 16:37:37

---

Confusing: organic or inorganic? Please correct.



$$c = K_H * p \quad (1)$$

where  $c$  is the concentration in  $\text{mol L}^{-1}$ ,  $p$  the pressure in atm and  $K_H$  the Henry-constant that was corrected according to Sander (1999) for mean soil temperatures of  $10^\circ\text{C}$  in February 2015 and 2016 as well as  $7^\circ\text{C}$  in April at a depth of 0.5 m. DIC concentrations at prevalent pH conditions were calculated with respect to carbonate speciation considering equilibrium constants following Stumm and Morgan (1996). All pore water data were reported as mean  $\pm$  standard deviation ( $N = 3$ ).

Zones of  $\text{CH}_4$  production and consumption in the peat column were visually identified based on observed pore water concentration gradients. For a quantitative evaluation of pore water concentration gradients, steady-state conditions as well as a dominance of diffusive gas transport would have to be assumed; this may only partly apply to the system under study here, given the large root biomass. Nevertheless, we additionally applied a software routine using inverse modelling (PROFILE, Berg et al., 1998) for zone identification. This modelling approach supported the results obtained visually, but provided further rough estimates for production and consumption zones due to the complex diffusivity in the rhizosphere of highly rooted peat and, thus, results are presented in the appendix only.

An apparent isotopic fractionation factor  $a_c$  was determined (Whiticar et al., 1986; Hornibrook et al., 2000) to assess the predominant methanogenic pathway and / or methanotrophic activity following Eq. (2):

$$a_c = \frac{\delta^{13}\text{C}_{\text{CO}_2} + 1000}{\delta^{13}\text{C}_{\text{CH}_4} + 1000} \quad (2)$$

### 3 Results

#### 3.1 Characteristics of solid peat and root biomass

Roots of *A. pumila* were present in the upper profile down to a depth of 1.8 m (rhizosphere) in *Astelia* lawn cores. Throughout the rhizosphere, we observed a highly decomposed and amorphous peat supposedly originating from *A. pumila* that developed above *Sphagnum* peat. Peat below *Sphagnum* lawns was continuously formed predominantly by *Sphagnum*. Total C and N contents in the peat together with natural abundance of  $^{15}\text{N}$  and  $^{13}\text{C}$  are given in Table 3. Root density of *D. fascicularis* was  $0.014 \pm 0.010 \text{ g DW L}^{-1}$  at 0.35 m depth while root density of *A. pumila* was not determined once again as it has been already described in the literature for our study site.

#### 3.2 Environmental conditions and potential controls on $\text{CH}_4$ fluxes

The study site was characterized by daily mean PAR values up to  $\sim 700 \mu\text{mol m}^{-2} \text{ s}^{-1}$  with maximum values exceeding  $2000 \mu\text{mol m}^{-2} \text{ s}^{-1}$  and daily mean air temperatures ranging from  $-0.5^\circ\text{C}$  to  $17^\circ\text{C}$  during the measurement campaigns in austral summer from January to April (Fig. 2). Soil temperature in summer reached maximum daily average values of  $15^\circ\text{C}$  and  $12^\circ\text{C}$  at 0.05 m depth and 0.5 m depth, respectively. Concurrently, the water table fluctuated close to the surface between  $-0.03 \text{ m}$  and  $-0.23 \text{ m}$  and differed consistently about few centimetres between the two water table measurement sites in *Astelia* lawns.

---

 Number: 1 Author: Subject: Highlight Date: 2018-09-21 17:22:00

---

Again, liter is not clear for peat as volume containing roots.

 Number: 2 Author: Subject: Highlight Date: 2018-09-21 17:18:22

---

Please, provide here a value with the reference to study (studies). This will help better compare the differences between plant species.

CH<sub>4</sub> fluxes were well detectable, but approached zero in many cases. For collars exhibiting low magnitude fluxes neither any seasonal trend (data not shown) nor a relationship to water table and soil temperature fluctuations could be identified (Table 2). Yet, significant relationships between water table fluctuations or variations in soil temperatures were established for those few lawns with considerable emissions (Table 2).

### 5 3.3 Soil-atmosphere CH<sub>4</sub> fluxes and features of microforms possibly affecting CH<sub>4</sub> emissions

Summer CH<sub>4</sub> emissions in a South Patagonian cushion bog were highly variable among the dominant microforms *Astelia* lawns, *Sphagnum* lawns and *Donatia* lawns characterized by specific plant species as well as pools and showed a pronounced spatial pattern even within microforms. Compared to all other microforms, only *Sphagnum* lawns showed considerable emissions with  $1.52 \pm 1.10$  mmol CH<sub>4</sub> m<sup>-2</sup> d<sup>-1</sup> while *Astelia* lawns emitted nearly no CH<sub>4</sub> with  $0.09 \pm 0.16$  mmol m<sup>-2</sup> d<sup>-1</sup> (Fig. 3). Methane emissions from pools were also low ( $0.23 \pm 0.25$  mmol m<sup>-2</sup> d<sup>-1</sup>) and not significantly different from intermediate *Donatia* lawn fluxes ( $0.66 \pm 0.96$  mmol CH<sub>4</sub> m<sup>-2</sup> d<sup>-1</sup>). During some occasions, we determined even significant, negative CH<sub>4</sub> fluxes, mainly from *Astelia* lawns (Fig. 3a, Table 2). Most of these negative fluxes as well as the majority of fluxes (41%) that were set to zero were obtained from one individual collar throughout the whole measurement campaigns precluding the possibility of a measurement artefact.

As indicated by high standard deviations, CH<sub>4</sub> emissions between replicates of all microforms were not consistent. Field observations suggested that CH<sub>4</sub> emissions of a microform were not only controlled by the predominant plant species, but might have been associated with additional features of the respective microform. Therefore additional microform features (i.e. number of *T. magellanicum* shoots, cover of *D. fascicularis*, extend of the microform in which a specific collar was installed) were assessed. However, as we did not expect such small-scale spatial variability between emissions of individual collars, the results of this survey given in Table 2 are of rather explorative, preliminary character as the low number of replicates (3 to 5 collars) in combination with several outliers barely allows any sound statistical analysis. Nevertheless, collars with elevated or comparatively high emissions had some features in common: Emissions from one *Astelia* lawn were with  $\sim 0.3$  mmol CH<sub>4</sub> m<sup>-2</sup> d<sup>-1</sup> (significantly) higher in both sampling years compared to fluxes measured from the other *Astelia* lawns. This *Astelia* lawn collar with elevated emissions was characterized by (I) the presence of many *T. magellanicum* shoots together with a high share of *D. fascicularis* and (II) placed in a lawn with small extent surrounded by a mosaic of small pools and *D. fascicularis* patches (both smaller than 1 m<sup>2</sup>). Surprisingly, also one *Donatia* lawn was a substantial CH<sub>4</sub> source of  $2.10 \pm 0.14$  mmol m<sup>-2</sup> d<sup>-1</sup>, even exceeding the highest emissions observed from *Sphagnum* lawns on all measurement occasions in 2016. Similar to the *Astelia* lawn with elevated emissions, the collars of *Donatia* and *Sphagnum* lawns with high emissions were characterized by (I) a high amount of *T. magellanicum* shoots and (II) placed in lawns surrounded by small pools and other patches of *D. fascicularis* with no *A. pumila* nearby. Emissions obtained from one *Sphagnum* lawn were with less than 0.3 mmol CH<sub>4</sub> m<sup>-2</sup> d<sup>-1</sup> in both sampling years significantly lower compared to emissions from other *Sphagnum* lawns. Vice versa,

---

 Number: 1 Author: Subject: Strikeout Date: 2018-09-21 17:26:42

---

 Number: 2 Author: Subject: Highlight Date: 2018-09-21 17:26:31

This is confusing: zero flux is not detectable (otherwise it is a positive or negative). Please, rephrase.  
I am still wondering if outside air temperature is -0.5 C, how could 3 min be enough to measure any CH<sub>4</sub> flux.

this collar with low *Sphagnum* emissions was characterized by (I) the lowest number of *T. magellanicum* shoots among all *Sphagnum* lawn collars and (II) installed in a small *Sphagnum* lawn surrounded by *A. pumila*.

### 3.4 Pore water CH<sub>4</sub> and DIC concentration profiles

Pore water profiles in peat columns below *Astelia* lawns and pools showed similar trends in pore water concentrations and during both sampling years. CH<sub>4</sub> concentrations were almost zero in the upper pore water profile below *Astelia* lawns (< 0.003 mmol L<sup>-1</sup>) down to a depth of around 1.5 m, which corresponds to the zone where the rhizosphere was most pronounced (Fig. 4a). Below this depth, CH<sub>4</sub> concentrations sharply increased up to  $0.25 \pm 0.08$  mmol L<sup>-1</sup> at 3 m depth. CH<sub>4</sub> concentrations in pore water profiles below pools resembled profiles obtained under *Astelia* lawns on elevated levels. Throughout the upper profile down to 1.5 m, CH<sub>4</sub> concentrations were  $\sim 0.03$  mmol L<sup>-1</sup> with a peak around 0.3 m depth ( $0.06 \pm 0.06$  mmol L<sup>-1</sup>) and increased steeply to  $0.40 \pm 0.25$  mmol L<sup>-1</sup> in 3 m depth. Maximum concentrations in comparable depths reached similar levels in both sampling years below *Astelia* lawns, but maximum concentrations below pools were about 3 times higher in 2015 compared to 2016.

DIC predominantly occurred as dissolved CO<sub>2</sub> because of the low pH ranging from 3.36 to 4.77. In contrast to CH<sub>4</sub>, DIC concentrations increased constantly with depth from around 1 mmol L<sup>-1</sup> near the surface to  $2.60 \pm 1.0$  mmol L<sup>-1</sup> in 2 m depth below *Astelia* lawns and  $2.94 \pm 1.1$  mmol L<sup>-1</sup> in 3 m depth below pools (Fig. 4b). With depth, DIC converged with CH<sub>4</sub> concentrations, which was reflected by DIC:CH<sub>4</sub> ratios that were extremely high in the rhizosphere below *Astelia* lawns exceeding 100 (Fig. 4c). Beneath the rhizosphere, ratios steeply approached values below 40. Under pools, ratios slightly decreased with depth but were mostly around 40 down to 1.5 m with two distinct peaks of very little CH<sub>4</sub> at the surface and around 0.8 m depth. In deep peat layers below the rhizosphere, DIC:CH<sub>4</sub> ratios detected under *Astelia* lawns and pools converged and reached lowest ratios of  $\sim 10$  and  $\sim 5$ , respectively.

Visual inspection of concentration profiles but also modelling of CH<sub>4</sub> production and consumption rates indicated a predominance of CH<sub>4</sub> consumption throughout the whole rhizosphere below *Astelia* lawns and in roughly corresponding depths under pools (Fig. 4a, Fig. 6). Maximum CH<sub>4</sub> consumption was identified in the lower rhizosphere around 1.5-2 m where the increase in CH<sub>4</sub> concentration was most pronounced. Deep peat layers below the rhizosphere of *Astelia* lawns and similar depths below pools were considered as CH<sub>4</sub> sources. In these depths, the high concentration levels of CH<sub>4</sub> (up to  $0.40 \pm 0.25$  mmol L<sup>-1</sup>) sustain substantial upward diffusion of CH<sub>4</sub> following the concentration gradient into the consumption zone within the rhizosphere.

### 3.5 Composition of pore water in carbon isotopic values and apparent fractionation

Values of  $\delta^{13}\text{C}$  in CH<sub>4</sub> did not show a clear depth trend below *Astelia* lawns and scattered in the upper profile down to 2 m depth between  $-87.2 \pm 10.1$  to  $-72.1 \pm 10.3\%$  (Fig. 4d). Isotopic  $\delta^{13}\text{C}$ -CH<sub>4</sub> values below pools became less negative with depth

---

 Number: 1 Author: Subject: Highlight Date: 2018-09-21 17:53:34

There was no rhizosphere below pools, so what then caused the gradient?

---

 Number: 2 Author: Subject: Highlight Date: 2018-09-21 17:54:58

Suggest to rephrase: Carbon isotopic values in pore water and apparent fractionation.

from  $-93.4 \pm 9.2$  to  $-73.7 \pm 1.2\text{‰}$  with a minimum peak in upper peat layers around 0.3 m of  $-101.0 \pm 5.6\text{‰}$ . In the upper meter of the profile, values of  $\delta^{13}\text{C-CH}_4$  were thus up to 25‰ more negative below pools compared to *Astelia* lawns while the isotopic values of both profiles converged in deep peat layers below 2 m at  $-80\text{‰}$ . Values of  $\delta^{13}\text{C}$  in  $\text{CO}_2$  below *Astelia* lawns became more negative with depth in the upper profile down to 1 m reaching values as low as  $-32.4 \pm 0.8\text{‰}$  and increased to  $-19.5 \pm 1.0\text{‰}$  in 3 m depth. Below pools, values became less negative with depth throughout the whole profile from  $-21.2 \pm 0.4$  to  $-6.0 \pm 1.5\text{‰}$  (Fig. 4e).

Apparent fractionation factors varied only slightly and showed opposite trends below the two microforms. Values increased slightly from 1.060 to 1.066 below *Astelia* lawns, peaking at 1.045 in 0.5 m depth. Below pools, apparent fractionation factors decreased with depth from 1.079 to 1.073 with a maximum of 1.091 around 0.3 m depth (Fig. 4f).

### 10 3.6 Hydrogen, oxygen and sulfate concentrations in pore water profiles

Hydrogen concentrations were mostly below  $3 \text{ nmol L}^{-1}$  below *Astelia* lawns while they were elevated below pools, ranging between 3 and  $10 \text{ nmol L}^{-1}$  (Fig. 5a). Maximum concentrations were reached in the upper profile of *Astelia* lawns with up to  $11.83 \pm 17.88 \text{ nmol L}^{-1}$  and, besides a peak at the surface, below pools from 1 to 2 m depth with up to  $41.61 \pm 64.63 \text{ nmol L}^{-1}$ . Molecular oxygen concentrations were mostly below 5% saturation and tended to be higher in the upper profile down to 2 m below *Astelia* lawns compared to pools (Fig. 5b). Sulfate concentrations were similar below both, *Astelia* lawns and pools, and reached highest values near the surface with up to  $16.43 \pm 11.85 \text{ } \mu\text{mol L}^{-1}$ . With depth, concentrations decreased and approached zero below 1 m (Fig. 5c).

## 4 Discussion

This study is among the first dealing with  $\text{CH}_4$  production, consumption and emissions in an austral, vascular-plant dominated cushion bog. We aimed to reveal patterns of  $\text{CH}_4$  emissions and their environmental as well as potential belowground biogeochemical controls. We furthermore attempted to elucidate the  $\text{CH}_4$  dynamics in the peat below the four predominant microforms on a conceptual level based on the results presented here together and previous studies.

### 4.1 Environmental controls on $\text{CH}_4$ emissions

Summer  $\text{CH}_4$  emissions of a South Patagonian cushion bog dominated by *A. pumila* were low albeit spatial heterogeneity was pronounced with small patches of *Sphagnum* or *Donatia* lawns being local emission hot spots. The variation of  $\text{CH}_4$  fluxes was mainly controlled by the dominant plant species of each lawn microform which emitted significantly different amounts of  $\text{CH}_4$ . We found only few significant responses of  $\text{CH}_4$  fluxes to water table fluctuations or variations in soil temperatures (Table 2). Such weak coupling between environmental variables and  $\text{CH}_4$  emissions is not surprising as fluxes from most individual collars were relatively low. Furthermore, the water table fluctuated only slightly near the surface (Fig. 2) and may

---

 Number: 1 Author: Subject: Replace Date: 2018-09-21 18:00:28  
fractionation

---

 Number: 2 Author: Subject: Replace Date: 2018-09-24 11:57:25  
with?

---



thus not serve as a primary control on CH<sub>4</sub> emissions. Stronger effects may only be expected when amplitude and duration of fluctuations affect peat redox conditions substantially (Blodau and Moore, 2003; Knorr et al., 2009). Under such stable moisture conditions and as long as methanogenesis is not limited by substrate supply, the sensitivity of methanogenic microbial consortia to temperature should become apparent (Whalen, 2005). Variations in landscape CH<sub>4</sub> fluxes have indeed been related to soil temperature previously (Rinne et al., 2007; Jackowicz-Korczyński et al., 2010; Goodrich et al., 2015) which is in accordance with the present study. The temporal variability of CH<sub>4</sub> emissions over the two investigated seasons was rather low (data not shown) due to low seasonality in both, temperature and precipitation, in the study region. Measurement campaigns extending over shoulder seasons and comparing years of contrasting weather conditions would be necessary to reveal the impact of more pronounced water table fluctuations or temperature regimes on CH<sub>4</sub> fluxes in South Patagonian cushion bogs.

#### 4.2 *Astelia* lawns – zero emission scenario

Emissions from *Astelia* lawns were minute ( $0.09 \pm 0.16 \text{ mmol m}^{-2} \text{ d}^{-1}$ ) and significantly lower than from all other microforms (Fig. 3) verifying our first hypothesis. The near-zero emissions were well explained by near-zero CH<sub>4</sub> concentrations ( $< 0.003 \text{ mmol L}^{-1}$ ) in the rhizosphere down to around 1.8 m. Only below, concentrations increased sharply to  $0.2 \text{ mmol L}^{-1}$  in 2 m depth (Fig. 4a). The low CH<sub>4</sub> concentrations even turned some *Astelia* lawns into a small sink for atmospheric CH<sub>4</sub> as shown by negative fluxes that were obtained sporadically throughout the whole measurement campaigns, confirming earlier results (Kip et al., 2012). These findings agree with previous research by Fritz et al. (2011) who observed CH<sub>4</sub> emissions from *Astelia* lawns in a comparably low magnitude as presented here and presented a similar CH<sub>4</sub> concentration depth profile. Extremely low CH<sub>4</sub> concentrations have also been obtained by Dullo et al. (2017) in upper peat layers of an Ethiopian cushion bog. Nevertheless, in deep peat layers below the rhizosphere, CH<sub>4</sub> concentrations of our study approached magnitudes reported for Chilean bogs with mixed vegetation consisting of *Sphagnum* mosses and *A. pumila* (Broder et al., 2015). This is in the lower range of concentrations described from northern bogs mostly around  $0.5 \text{ mmol L}^{-1}$  (e.g. Blodau and Moore, 2003; Beer and Blodau, 2007; Beer et al., 2008; Corbett et al., 2013) but even reaching up to  $5 \text{ mmol L}^{-1}$  in comparable depths (Steinmann et al., 2008). A CH<sub>4</sub> concentration profile as observed at our site yet suggests that in deep peat layers below the rhizosphere ( $> 2 \text{ m}$ ) CH<sub>4</sub> was produced at substantial rates and comparably low oxidation, as indicated by DIC:CH<sub>4</sub> ratios notably smaller than 40 (Fig. 4c). Subsequently, CH<sub>4</sub> got almost completely oxidized on its diffusive way upward to the atmosphere as visualized on a conceptual level (Fig. 6). Ratios of DIC:CH<sub>4</sub> under methanogenic conditions in northern bogs are typically around 5 (e.g. Hornibrook et al., 1997; Blodau and Moore, 2003; Corbett et al., 2013), but can be as high as 30 (Steinmann et al., 2008). Notably higher ratios within the rhizosphere suggest methanotrophic activity and availability of alternative electron acceptors such as O<sub>2</sub> from aerenchymous roots suppressing methanogenesis (Colmer, 2003; Mainiero and Kazda, 2005; Knorr et al., 2008b, Fritz et al., 2011; Dullo et al., 2017). Diffusion and plant-mediated transport as pathways for upward CH<sub>4</sub> transport

Please, check the definitions: typically, "alternative" means alternative to oxygen. So, oxygen cannot be alternative to itself.

would have caused higher emissions and ebullition requires supersaturation of at least  $\sim 350 \text{ mmol CH}_4 \text{ L}^{-1}$  in the pore water (Fechner-Levy and Hemond, 1996; Beer et al., 2008). The sharp drop in  $\text{CH}_4$  concentrations from -2 to -1.5 m depth characterized this peat layer as a zone of strongest methanotrophic activity, as supported by modelled consumption zones.

The assumption that root  $\text{O}_2$  release by *A. pumila* and thus locally associated  $\text{CH}_4$  oxidation was the most likely  $\text{CH}_4$  sink was further supported by carbon isotopic values obtained from pore water profiles that reflected rhizosphere processes. Methane isotopic signatures were close to  $-80\text{‰}$  in deep peat layers while above 2 m depth values scattered between  $-90$  to  $-70\text{‰}$  throughout the rhizosphere (Fig. 4d). Methane more depleted in  $^{13}\text{C}$  within the rhizosphere is likely explained by more reduced, methanogenic microsites in absence of living roots. However, less negative values revealed a strong influence of  $\text{CH}_4$  oxidation on the isotopic signature as an enrichment of up to  $10\text{‰}$  cannot be explained solely by upward diffusion of  $\text{CH}_4$ , especially since the scatter in  $\delta^{13}\text{C}\text{-CH}_4$  values was associated with the presence of aerenchymous roots. Oxidation of  $\text{CH}_4$  is a strongly fractionating processes leaving the remaining  $\text{CH}_4$  in the pore water enriched by  $\sim 10\text{‰}$  while produced  $\text{CO}_2$  becomes depleted (Chasar et al., 2000; Popp et al., 1999). Accordingly,  $\delta^{13}\text{C}\text{-CO}_2$  values were depleted throughout the rhizosphere and became less negative only at greater depths (Fig. 4e). A more negative  $\delta^{13}\text{C}\text{-CO}_2$  signature could also be explained by root respiration adding depleted  $\text{CO}_2$  to the pore water (Corbett et al., 2013). However, values of  $\delta^{13}\text{C}\text{-CO}_2$  of less than  $-30\text{‰}$  being substantially lower than the source organic matter material around  $-26\text{‰}$  (Table 3) can only be explained by influence of particularly  $^{13}\text{C}$  depleted carbon from oxidation of  $^{13}\text{C}$  depleted  $\text{CH}_4$ .

The scatter of  $\delta^{13}\text{C}\text{-CH}_4$  values throughout the rhizosphere and the  $\delta^{13}\text{C}\text{-CH}_4$  depth pattern (Fig. 4d) thus indicated a coexistence of microsites because enriched  $\text{CH}_4$  being only a leftover from  $\text{CH}_4$  oxidation should result in a  $\delta^{13}\text{C}\text{-CH}_4$  depth pattern following that of the  $\delta^{13}\text{C}\text{-CO}_2$  profile (Hornibrook et al., 2000). The occurrence of small-scale microsites created by root  $\text{O}_2$  release into water-saturated (peat) layers has been previously suggested (Colmer, 2003), also for peatlands on the northern hemisphere (Popp et al., 1999; Knorr et al., 2008b; Corbett et al., 2013). In aerobic, more oxidized microsites attached to roots fresh and labile organic matter and  $\text{CH}_4$  could be rapidly consumed by aerobic respiration and methanotrophy. These aerobic microsites were likely surrounded by anoxic conditions, enabled by a water table fluctuating near the surface. Within these anaerobic microsites labile organic matter from roots could have served as substrate to produce few amounts of  $\text{CH}_4$  by acetoclastic methanogenesis. This was indicated by a  $^{12}\text{C}/^{13}\text{C}$  fractionation factor mostly below 1.055 typical for acetoclastic methanogenesis although based on  $^{13}\text{C}$  isotope fractionation alone this pathway cannot be clearly separated from methanotrophic conditions (Whiticar et al., 1986; Conrad, 2005). Despite  $\text{CH}_4$  production by the acetoclastic pathway in anaerobic microsites throughout the rhizosphere supports our third hypothesis, net  $\text{CH}_4$  production was negligible as produced  $\text{CH}_4$  was largely consumed in aerobic microsites. Therefore, the apparently small  $^{12}\text{C}/^{13}\text{C}$  fractionation observed within the rhizosphere could have been arisen by both, acetoclastic methanogenesis and methanotrophy. Below 2 m depth  $^{12}\text{C}/^{13}\text{C}$  fractionation indicated a shift to a predominance of hydrogenotrophic methanogenesis and absence of notable methanotrophic activity (Fig. 4f) as  $a_c$ -values increased with depth towards 1.065 (Whiticar et al., 1986; Conrad, 2005).

High  $\text{DIC}:\text{CH}_4$  ratios mostly exceeding 100 throughout the prevailing water-saturated rhizosphere suggested a considerable contribution of further respiration processes to  $\text{CO}_2$  production. While autotrophic  $\text{CO}_2$  release by root respiration was

---

 **Number: 1 Author: Subject: Highlight Date: 2018-09-24 12:42:21**

With this, authors attempt to oversell their results: "scattered between" seemingly indicate no significant difference. Indeed, Fig. 4d demonstrate rather narrow  $\delta^{13}\text{C}$ -CH<sub>4</sub> range along the whole depth profile. So, in fact,  $\delta^{13}\text{C}$ -CH<sub>4</sub> signal alone was not informative enough to approve the strong oxidative properties of rhizosphere of *A. pumila*. I agree that both methanogenesis and oxidation may co-exist in close vicinity, but still it may not explain lack of  $\delta^{13}\text{C}$ -CH<sub>4</sub> variation between upper and lower horizons unless CH<sub>4</sub> produced in the rhizosphere region is even more depleted in  $^{13}\text{C}$  than in deeper layers. The explanation of this phenomenon because of "more reduced...microsites" is not fully clear. More than below the rhizosphere? Why?

---

 **Number: 2 Author: Subject: Note Date: 2018-09-24 12:54:14**

According to this oxidation concept, the most  $^{13}\text{C}$  enriched CH<sub>4</sub> has to be allocated at the shallowest depth. However, in contrast, it is ca. 10‰ more depleted than next depth levels (20-50 cm). In addition,  $\delta^{13}\text{C}$ -CO<sub>2</sub> is relatively more enriched that in deeper layers. How is this possible?

---

 **Number: 3 Author: Subject: Highlight Date: 2018-09-24 12:58:19**

This information is already repetition of the message above. I suggest to merge both parts telling the story as here but with the reference to results as in the previous paragraph. Otherwise, it is excessive.

---

 **Number: 4 Author: Subject: Highlight Date: 2018-09-24 13:07:25**

This contradicts to the data measured: having acetoclastic methanogenesis and co-existence of oxidation should generate much more enriched  $\delta^{13}\text{C}$ -CH<sub>4</sub> values in comparison to deep peat. Fig. 4d cannot support this. Seemingly, change of fractionation factor with depth was not significant either. The available data are not enough to approve existence of acetoclastic methaogenesis. Please, discuss this.

---

 **Number: 5 Author: Subject: Highlight Date: 2018-09-24 13:09:12**

Again, there is not enough evidence to support the hypothesis. As it is stated, this is speculation and should be rephrased.

---

 **Number: 6 Author: Subject: Highlight Date: 2018-09-24 13:10:55**

Yes, but it was small below the rhizosphere too! Speculation!

---

 **Number: 7 Author: Subject: Highlight Date: 2018-09-24 13:12:48**

They also increased at the very top of profile. No information about significance of differences in fractionation factor between depths is provided.

supposed to be substantial, O<sub>2</sub> release by roots still exceeded consumption, as demonstrated by O<sub>2</sub> saturation reaching up to 10%. This O<sub>2</sub> supply may thus not only fuel CH<sub>4</sub> oxidation but also heterotrophic respiration using molecular oxygen or other electron acceptors regenerated by this O<sub>2</sub> input (Colmer, 2003; Mainiero and Kazda; 2005). Besides aerobic respiration in oxidized microsites attached to roots, other likely sources of CO<sub>2</sub> could have been dissimilatory sulfate reduction in anaerobic microsites of surface peat layers down to 0.4 m with sulfate originating e.g. from sea spray (Kleinebecker et al., 2008; Broder et al., 2015). Elevated H<sub>2</sub> levels in the rhizosphere<sup>1</sup> indicated high H<sub>2</sub> production by fermentation compared to consumption by e.g. sulfate reduction, presumably due to high root litter input and root exudates (Knorr et al., 2009; Estop-Aragonés et al., 2013).

#### 4.3 Pools – low emission scenario

10 Pools exhibited with  $0.23 \pm 0.25$  mmol CH<sub>4</sub> m<sup>-2</sup> d<sup>-1</sup> second lowest emissions of the microforms under study (Fig. 3). Such low emissions measured from pools were somewhat surprising since they have been previously reported to be similar to *Sphagnum* lawns (Fritz et al., 2011) and were expected to be relevant CH<sub>4</sub> sources because of prevailing anoxic conditions (Blodau, 2002). Moreover, other studies identified pools as hot-spots of CH<sub>4</sub> emissions from peatlands (Hamilton et al., 1994; Pelletier et al., 2014; Burger et al., 2016). This was clearly not the case in our study, as emissions were in the same order of magnitude as  
15 pool fluxes in South Patagonian *Sphagnum* bogs (Lehmann et al., 2016).

Low emissions from pools were associated with CH<sub>4</sub> pore water concentrations following those below *Astelia* lawns on slightly elevated levels (Fig. 4a). These results verified our second hypothesis stating that pore water CH<sub>4</sub> concentrations of non-rooted  
peat below pools remains less affected by CH<sub>4</sub> oxidation compared to *Astelia* lawns. Nevertheless, it was surprising that CH<sub>4</sub>  
concentration profiles below pools clearly resembled profiles obtained under *Astelia* lawns. Such concentration profile<sup>3</sup>  
20 suggests that *A. pumila* roots controlled even CH<sub>4</sub> dynamics below adjacent microforms as visualized on a conceptual level in  
Figure 6. To explain low CH<sub>4</sub> concentrations in upper peat layers below pools, we suggest that the thorough CH<sub>4</sub> oxidation  
below *Astelia* lawns can also establish a lateral concentration gradient<sup>4</sup>. Thereby, CH<sub>4</sub> from adjacent microforms gets  
redistributed to the rhizosphere of *Astelia* lawns where it is consumed. Throughout the rhizosphere of *Astelia* lawns and in<sup>5</sup>  
corresponding depths below pools, we observed a highly decomposed and amorphous peat as previously described for cushion  
25 bogs (Ruthsatz and Villagran, 1991; Fritz et al., 2011) indicating a very high water permeability that would together with a  
high water table position enable such lateral redistribution (Baird et al., 2016). The assumption of lateral pore water movement  
was supported by a peak in DIC:CH<sub>4</sub> ratios accompanied by very low CH<sub>4</sub> concentrations around 0.8 m below pools (Fig. 4c)  
as upward diffusion against the concentration gradient is impossible. Lateral root ingrowth and O<sub>2</sub> supply from adjacent *Astelia*<sup>6</sup>  
lawns could furthermore keep CH<sub>4</sub> concentrations in upper peat layers below pools at a low level, in particular if pools are  
30 small.

As observed under *Astelia* lawns, CH<sub>4</sub> was produced in deep peat layers below pools also predominantly by hydrogenotrophic methanogenesis and diffused upwards. In upper peat layers influenced by lateral movement of pore water, oxidation of CH<sub>4</sub>

---

 **Number: 1 Author: Subject: Highlight Date: 2018-09-24 13:38:45**

This may also mean occurrence of hydrogenotrophic methanogenesis in anaerobic rhizosphere zones. For example, Galand et al. (2002) FEMS, demonstrated dominance of H<sub>2</sub>-trophic methanogens in upper peat layer in a boreal northern peatland. Is there any evidence for southern peatlands too? This may partly explain relatively depleted d<sup>13</sup>C values of CH<sub>4</sub> in the rhizosphere zone.

---

 **Number: 2 Author: Subject: Highlight Date: 2018-09-24 14:44:12**

This can be misleading: 2nd hypothesis specified processes based on isotopic values, whereas here authors refer more to the concentrations/fluxes thereby considering rather 1st hypothesis. The latter, however was not supported. Please, rephrase.  
Also regarding the 2nd hypothesis, "less affected" is not appropriate for the hypothesis. Please, check the respective comment above.

---

 **Number: 3 Author: Subject: Highlight Date: 2018-09-24 14:48:30**

This is not clear: How could roots of *A. pumila* appear under pools? Was this observed during coring? If so, then the conceptual diagram should demonstrate that roots of *A. pumila* expand below pools. Check and correct accordingly.

---

 **Number: 4 Author: Subject: Highlight Date: 2018-09-24 14:51:27**

Of what, CH<sub>4</sub> or oxygen?

---

 **Number: 5 Author: Subject: Highlight Date: 2018-09-24 15:11:08**

This statement is unclear: whereas gas diffusion along gradient is clear for me (from pools to lawns) water movement is not the same. Pools are local depressions, so water should flow from lawns into pools. If this flow is so low, then the gas diffusion in opposite direction can be stronger, but this means almost standing water. In case there is a lateral flow of water (what is very natural), then the gas flow can't be counter to it. Therefore, I could understand the inflow of oxygen from lawns into pools, but not CH<sub>4</sub> from pools to lawns. The overall picture may change if there is a slope, but then lawns and pools have to be arranged accordingly. Pools will get matter of those lawns which are elevated and transfer it downwards to other lawns. If there is a slope on the site, then the conceptual figure should somehow reflect it. Check!

---

 **Number: 6 Author: Subject: Highlight Date: 2018-09-24 15:16:30**

What is meant, suppression of methanogenesis or CH<sub>4</sub> oxidation? This is important in context of measured isotope values. Please, specify.

seemed to occur. However, the sink strength was likely of minor importance compared to *Astelia* lawns, as indicated by less depleted  $\delta^{13}\text{C-CO}_2$  signatures throughout the whole profile (Fig. 4e) on typical levels for peat pore water concentrations (Hornibrook et al., 2000; Beer et al., 2008) and a less enriched  $\delta^{13}\text{C-CH}_4$  signature following largely that of  $\delta^{13}\text{C-CO}_2$  (Fig. 4d, e) indicative for hydrogenotrophic methanogenesis.

- 5 Levels of  $\text{H}_2$  concentrations  $\sim 10 \text{ nmol L}^{-1}$  sufficient to maintain hydrogenotrophic methanogenesis (Heimann et al., 2010) accompanied by lower DIC: $\text{CH}_4$  ratios suggested methanogenic conditions over the whole profile at least in anaerobic microsites. However, overall  $\text{CH}_4$  production seemed to be limited throughout the profile, especially at peaking  $\text{H}_2$  levels from 1 to 2 m depth, by low substrate supply from highly decomposed organic matter and thus unfavourable thermodynamic conditions as suggested by very negative  $\delta^{13}\text{C-CH}_4$  signatures (Fig. 4d, 5a) (Knorr et al., 2008a; Hornibrook et al., 1997).
- 10 Within the open water of pools which was well-mixed by strong winds  $\text{CH}_4$  production and excess of  $\text{H}_2$  was diminished due to electron acceptor availability for consumption (e.g.  $\text{O}_2$ , sulfate). Pool sediments were inhabited by cyanobacteria (Arsenault et al., 2018) and submerged *Sphagnum* mosses (Kip et al., 2012) that provided recalcitrant organic matter for  $\text{CH}_4$  production in small quantities, as indicated by a slight peak of  $\text{CH}_4$  concentrations associated with lower DIC: $\text{CH}_4$  ratios and elevated  $\text{H}_2$  ratios around 0.3 m depth. Hydrogenotrophic methanogenesis prevailed as indicated by highly depleted  $\delta^{13}\text{C-CH}_4$  accompanied
- 15 with peaking  $a_c$ -values in that depth (Fig. 4f). Nevertheless,  $\text{CH}_4$  could not enter to the atmosphere as it was rapidly consumed by methanotrophic bacteria inhabiting *Sphagnum* mosses (Kip et al., 2012; Knoblauch et al., 2015) or associated with cyanobacteria. Thus, the pools at our study site belonged to examples of low emission pools as described in Knoblauch et al. (2015).

#### 4.4 *Sphagnum* and *Donatia* lawns – low to moderate emission scenario

- 20  $\text{CH}_4$  emissions from *Sphagnum* and *Donatia* lawns were most variable among microforms ranging from near-zero to local emission hotspots. *Sphagnum* lawns showed significantly higher  $\text{CH}_4$  emissions of  $1.52 \pm 1.10 \text{ mmol m}^{-2} \text{ d}^{-1}$  than all other microforms (Fig. 3). Substantially higher fluxes from *Sphagnum* lawns at our study site have been previously described by Fritz et al. (2011) and emissions reported here were in the same order of magnitude as determined for *Sphagnum* lawns in South Patagonian bogs dominated by *Sphagnum* mosses (Broder et al., 2015; Lehmann et al., 2016). Highest emissions
- 25 obtained in the present study from *Sphagnum* and *Donatia* lawns were at intermediate levels compared to northern bogs (Blodau, 2002; Laine et al., 2007; Limpens et al., 2008).

- We present the first  $\text{CH}_4$  emission data obtained from *Donatia* lawns. Contrary to our expectations, *Donatia* lawns emitted  $0.66 \pm 0.96 \text{ mmol CH}_4 \text{ m}^{-2} \text{ d}^{-1}$  and had thus second highest  $\text{CH}_4$  emissions of our study. One lawn even exceeded emissions of the strongest *Sphagnum* lawn source (Fig. 3c, Table 2) on all measurement occasions. As these comparatively high emissions
- 30 could be well reproduced, we conclude that an artefact can be excluded. Therefore, our first hypotheses, that cushion plants emit negligible amounts of  $\text{CH}_4$ , could retrospectively only be partly confirmed, as it depends on the specific cushion forming plant species and likely its root characteristics. Cushion-forming *D. fascicularis* seemed to be more comparable to *Sphagnum*

---

 Number: 1 Author: Subject: Highlight Date: 2018-09-24 15:49:05

This is not fully clear: the limiting factor for hydrogenotrophic methanogenesis is typically H<sub>2</sub> which is very reactive, since C source is CO<sub>2</sub>. H<sub>2</sub> was sufficient, CO<sub>2</sub> concentrations were also available, so why was then H<sub>2</sub>-reduction methanogenesis although dominating (depleted d<sup>13</sup>C-CH<sub>4</sub>) but not intensive? Maybe other anaerobic processes (sulfate reduction) outcompeted methanogenesis?



lawns regarding CH<sub>4</sub> emissions. We conclude that the presence of cushion plants as a proxy for negligible CH<sub>4</sub> emissions from cushion bogs needs to be carefully interpreted.

*D. fascicularis* is like *A. pumila* a cushion-forming vascular plant establishing a deep and aerenchymous, but with < 0.05 g DW L<sup>-1</sup> a substantially less dense rooting system compared to *A. pumila* with > 4 g DW L<sup>-1</sup> in around 0.5 m depth (Fritz et al., 2011). The lower root density of *D. fascicularis* was probably below a specific threshold at which root O<sub>2</sub> release did not suppress CH<sub>4</sub> emission any more. Instead, the roots might have promoted CH<sub>4</sub> production by presence of labile root organic matter and even functioned as conduits for gas transport from anoxic peat layers to the atmosphere thereby enhancing CH<sub>4</sub> emissions (e.g. Joabsson et al., 1999; Colmer, 2003; Whalen, 2005). As root O<sub>2</sub> release facilitates nutrient mobilization (Colmer, 2003), this assumption of little if any O<sub>2</sub> release by *D. fascicularis* roots is in line with Schmidt et al. (2010) who found nutrient concentrations in *D. fascicularis* to be almost as low as in *S. magellanicum* while *A. pumila* contained significantly higher amounts of nutrients.

CH<sub>4</sub> production, consumption and emission in the study site appeared to be a function of root characteristics. Above a specific threshold of root density and activity associated with O<sub>2</sub> release, CH<sub>4</sub> emissions were suppressed while below this threshold, CH<sub>4</sub> production was accelerated by presence of labile root organic matter or exudates accompanied with O<sub>2</sub> consumption along with enhanced CH<sub>4</sub> transport by aerenchymatic roots (Blodau, 2002; Agethen et al., 2017). Such relationship was suggested by our preliminary observations of microform features associated with the pronounced spatial variability of CH<sub>4</sub> emissions and would explain why the *A. pumila* root oxygenation impact showed a pronounced spatial pattern and did not control the CH<sub>4</sub> dynamics in the entire upper peat. Accordingly, *Sphagnum* and *Donatia* lawns that showed substantial CH<sub>4</sub> emissions were beyond the sphere of influence by *A. pumila* roots. Although not measured here, CH<sub>4</sub> concentrations in the pore water below those lawns probably increased steeply below the water table (Fig. 6), like common depth profiles in northern (e.g. Beer and Blodau, 2007; Limpens et al., 2008; Corbett et al., 2013) or southern bogs (Broder et al., 2015). This explanation implies that the pore water below those lawns with remarkably higher emissions was not well-connected to pore water influenced by *A. pumila* roots. A spatial variability of peat physical properties on the ecosystem scale was suggested by water table records (Fig. 2) demonstrating that one site responded faster than the other to, for instance, precipitation events.

We speculate that the biogeochemistry below *Sphagnum* and *Donatia* lawns with near-zero emissions was, likewise to pools, influenced by the pronounced root activity of nearby *A. pumila* establishing a lateral concentration gradient for CH<sub>4</sub> thereby reducing CH<sub>4</sub> emissions (as visualized in Fig. 6). This assumption was supported by previous research in our study site. Fritz et al. (2011) showed that below *Sphagnum* lawns pore water CH<sub>4</sub> concentrations can be substantially lowered throughout rhizosphere-influenced peat layers compared to a reference site without *A. pumila* while in deep peat layers CH<sub>4</sub> concentrations increased steeply. Further research should be undertaken to investigate why CH<sub>4</sub> emissions from *Sphagnum* and *Donatia* lawns appear to be highly variable in order to understand CH<sub>4</sub> dynamics in under-researched cushion bogs.

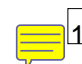

The section 4.4. is rather long and at several places contains repetitive text (e.g. page 17, lines 15-17, 21-23, 27-28; the effect of A. pumila roots was very clear, no need to repeat many times). I recommend condensing text strongly.

#### 4.5 Implications for ecosystem CH<sub>4</sub> emissions from Patagonian cushion bogs

Highest summer emissions in the present study were considerably lower compared to maximum austral summer fluxes of ~150 mg CH<sub>4</sub> m<sup>-2</sup> d<sup>-1</sup> (9.4 mmol m<sup>-2</sup> d<sup>-1</sup>) determined for a New Zealand bog dominated by the vascular evergreen “wire rush,” *Empodisma robustum* (Goodrich et al., 2015). The authors explained such high CH<sub>4</sub> emissions by comparatively wet conditions and a high density of aerenchymous vegetation providing a gas conduit for CH<sub>4</sub> transport in their study site. Compared to CH<sub>4</sub> emissions of northern bogs ranging from 3 to 53 mg m<sup>-2</sup> d<sup>-1</sup> at intermediate levels in wet bogs to up to 80 mg m<sup>-2</sup> d<sup>-1</sup> (Blodau, 2002; Laine et al., 2007; Limpens et al., 2008; 0.2 to 2.2 and up to 5 mmol m<sup>-2</sup> d<sup>-1</sup>), highest summer emissions in the present study represent a pronounced CH<sub>4</sub> source. Nevertheless, overall ecosystem CH<sub>4</sub> emissions would probably be among the lowest described for pristine bog ecosystems worldwide when taking into account the high proportion of the surface area where *Astelia* lawns prevailed.

While *Donatia* lawns covered only small parts of our study site, we observed other parts of the complex bog system in the whole study area to be widely dominated by *D. fascicularis* instead of *A. pumila* which is in line with previous studies (Heusser, 1995; Grootjans et al., 2014) who described the cushion bogs in the Moat landscape to be covered by both, *A. pumila* and *D. fascicularis*. Thus, amounts of emitted CH<sub>4</sub> could be significant also on the ecosystem scale once *D. fascicularis* dominates. For instance, a predominance of *D. fascicularis* is typical for later vegetation succession stages in cushion bogs of Tierra del Fuego (Heusser, 1995) or Chile (Ruthsatz and Villagran, 1991; Kleinebecker et al., 2007).

#### 5 Conclusion

We conclude from our study that root density and activity of cushion-forming *A. pumila* and associated O<sub>2</sub> supply strongly controlled CH<sub>4</sub> production and consumption in a pristine Patagonian cushion bog. Thereby, CH<sub>4</sub> emission were reduced to near-zero levels and largely decoupled from environmental controls. The high root density even regulated CH<sub>4</sub> dynamics below adjacent microforms with less or non-rooted peat such as pools, *Sphagnum* lawns or lawns dominated by cushion-forming *D. fascicularis* by maintaining lateral concentration gradients in upper peat layers. Nevertheless, when root density dropped below a certain threshold, CH<sub>4</sub> production might have been accelerated by presence of labile root organic matter or exudates accompanied with O<sub>2</sub> consumption along with enhanced CH<sub>4</sub> transport by aerenchymatic roots of e.g. *D. fascicularis*. Under such circumstances, CH<sub>4</sub> emissions increased to intermediate levels compared to northern bogs. Therefore, the presence of cushion plants as a proxy for negligible CH<sub>4</sub> emissions from cushion bogs should be interpreted carefully. As cushion bogs can be found in many (mostly southern) parts of the world and only very limited knowledge about CH<sub>4</sub> dynamics from these systems exist, future research should take into account a possibly high spatial variability of CH<sub>4</sub> emission from bogs dominated by cushion plants. We demonstrated an extreme scenario for how a spatial distribution of root density in the peat can lead to a pronounced pattern of CH<sub>4</sub> emissions. Yet, the underlying ratio between root characteristics and O<sub>2</sub> supply determining this emission pattern should be applicable to other densely rooted peatlands in general. Further research should be undertaken to

No Comments.

prove relationships that have been developed here on a conceptual level in order to extend our knowledge on CH<sub>4</sub> dynamics in under-researched cushion bogs.

*Data availability.* The data can be accessed by email request to the corresponding authors.

5 *Supplement related to this article available online at...*

*Author contributions.* CB, TK and WM designed the study. WM, CB, TK and VAP conducted field work and sample analyses with the help of KHK. WM performed data analyses and prepared the manuscript with contributions from KHK, TK and VAP.

*Competing interests.* The authors declare that they have no conflict of interest.

- 10 *Acknowledgement.* This study was carried out within the research project CANDYbog which was funded by the Deutsche Forschungsgemeinschaft (German Research Foundation, DFG; Grant No. KL2265/3-1 and BL 563/19-1). We highly appreciated the Centro Austral de Investigaciones Científicas (CADIC-CONICET) providing facilities that enabled our fieldwork in Ushuaia. The Prefectura Naval Argentina is acknowledged for offering facilities supporting our fieldwork. Lucas Varela of the La Posta Hostel family is appreciated for offering working space and logistics. We wish to acknowledge the
- 15 laborious field assistance of Isabella Nördemann, Carla Bockermann, Claudia Frank, Bettina Breuer, Lina Birkner, Juliane Kohlstruck, Laura Jansen, David Holl, Lars Kutzbach, María Florencia Castagnani, María Noel Szudruk Pascual. All analyses of this study were carried out in the laboratory of the institute of Landscape Ecology. The assistance of Ulrike Berning-Mader, Sebastian R. Schmidt, Ronya Wallis, Sabrina Knaack, Sina Berger, Simona Bonaiuti and Leandra Praetzel is greatly acknowledged. We thank Peter Sulmann for technical assistance.

No Comments.

## References

- Agethen, S., Sander, M., Waldemer, C., Knorr, K.-H.: Only low methane emissions from restored cutover bogs—The impact of vascular plants. In preparation, 2017.
- 5 Arsenault, J., Talbot, J., and Moore, T. R.: Environmental controls of C, N and P biogeochemistry in peatland pools, *Sci Total Environ*, 631-632, 714-722, 2018.
- Aselmann, I., and Crutzen, P. J.: Global distribution of natural freshwater wetlands and rice paddies, their net primary productivity, seasonality and possible methane emissions, *J Atmos Chem*, 8, 307-358, 1989.
- Baird, A. J., Milner, A. M., Blundell, A., Swindles, G. T., and Morris, P. J.: Microform-scale variations in peatland permeability and their ecohydrological implications, *J Ecol*, 104, 531-544, 2016.
- 10 Beer, J., and Blodau, C.: Transport and thermodynamics constrain belowground carbon turnover in a northern peatland, *Geochim Cosmochim Acta*, 71, 2989-3002, 2007.
- Beer, J., Lee, K., Whiticar, M., and Blodau, C.: Geochemical controls on anaerobic organic matter decomposition in a northern peatland, *Limnol Oceanogr*, 53, 1393-1407, 2008.
- 15 Benavides, J. C., Vitt, D. H., and Wieder, R. K.: The influence of climate change on recent peat accumulation patterns of *Distichia muscoides* cushion bogs in the high-elevation tropical Andes of Colombia, *Journal of Geophysical Research: Biogeosciences*, 118, 1627-1635, 2013.
- Berg, P., Risgaard-Petersen, N., and Rysgaard, S.: Interpretation of measured concentration profiles in sediment pore water, *Limnol Oceanogr*, 43, 1500-1510, 1998.
- 20 Berger, S., Praetzel, L. S. E., Goebel, M., Blodau, C., and Knorr, K. H.: Differential response of carbon cycling to long-term nutrient input and altered hydrological conditions in a continental Canadian peatland, *Biogeosciences*, 15, 885-903, 2018.
- Blodau, C.: Carbon cycling in peatlands - A review of processes and controls, *Environmental Reviews*, 10, 111-134, 2002.
- Blodau, C., and Moore, T. R.: Experimental response of peatland carbon dynamics to a water table fluctuation, *Aquat Sci*, 65, 47-62, 2003.
- 25 Bonaiuti, S., Blodau, C., and Knorr, K.-H.: Transport, anoxia and end-product accumulation control carbon dioxide and methane production and release in peat soils, *Biogeochemistry*, 133, 219-239, 2017.
- Borromei, A. M., Ponce, J. F., Coronato, A., Candel, M. S., Olivera, D., and Okuda, M.: Reconstrucción de la vegetación posglacial y su relación con el ascenso relativo del nivel del mar en el extremo este del canal Beagle, Tierra del Fuego, *Argentina Andean Geology*, 41, 362-379, 2014.
- 30 Boucher, F. C., Lavergne, S., Basile, M., Choler, P., and Aubert, S.: Evolution and biogeography of the cushion life form in angiosperms, *Perspectives in Plant Ecology, Evolution and Systematics*, 20, 22-31, 2016.

No Comments.



- Broder, T., Blodau, C., Biester, H., and Knorr, K. H.: Sea spray, trace elements, and decomposition patterns as possible constraints on the evolution of CH<sub>4</sub> and CO<sub>2</sub> concentrations and isotopic signatures in oceanic ombrotrophic bogs, *Biogeochemistry*, 122, 327-342, 2015.
- Burger, M., Berger, S., Spangenberg, I., and Blodau, C.: Summer fluxes of methane and carbon dioxide from a pond and floating mat in a continental Canadian peatland, *Biogeosciences Discuss.*, 2016, 1-35, 2016.
- Chasar, L. S., Chanton, J. P., Glaser, P. H., and Siegel, D. I.: Methane concentration and stable isotope distribution as evidence of rhizospheric processes: Comparison of a fen and bog in the Glacial Lake Agassiz Peatland complex, *Annals of Botany*, 86, 655-663, 2000.
- Colmer, T. D.: Long-distance transport of gases in plants: a perspective on internal aeration and radial oxygen loss from roots, *Plant, Cell & Environment*, 26, 17-36, 2003.
- Conrad, R.: Quantification of methanogenic pathways using stable carbon isotopic signatures: a review and a proposal, *Org Geochem*, 36, 739-752, 2005.
- Coombes, L., and Ramsay, P. M.: Vegetation of a cushion mire at 3600 m on Volcán Chiles, Ecuador, in: *The Ecology of Volcán Chiles. High altitude ecosystems on the Ecuador Colombia border*, edited by: Ramsay, P. M., Pebble & Shell Publications, Plymouth, 47-54, 2001.
- Corbett, J. E., Tfaily, M. M., Burdige, D. J., Cooper, W. T., Glaser, P. H., and Chanton, J. P.: Partitioning pathways of CO<sub>2</sub> production in peatlands with stable carbon isotopes, *Biogeochemistry*, 114, 327-340, 2013.
- Dullo, B. W., Grootjans, A. P., Roelofs, J. G. M., Senbeta, A. F., Fritz, C., and Lamers, L. P. M.: Radial oxygen loss by the cushion plant *Eriocaulon schimperii* prevents methane emissions from an East-African mountain mire, *Plant Biology*, 19, 736-741, 2017.
- Eckhardt, T. and Kutzbach, L.: MATLAB code to calculate gas fluxes from chamber based methods. Institute of Soil Science, Hamburg, Germany, <https://doi.pangaea.de/10.1594/PANGAEA.857799>, access: 17.07.2016.
- Estop-Aragones, C., Knorr, K. H., and Blodau, C.: Belowground in situ redox dynamics and methanogenesis recovery in a degraded fen during dry-wet cycles and flooding, *Biogeosciences*, 10, 421-436, 2013.
- Fechner-Levy, E. J., and Hemond, H. F.: Trapped methane volume and potential effects on methane ebullition in a northern peatland, *Limnol Oceanogr*, 41, 1375-1383, 1996.
- Fonkén, M. S. M.: An introduction to the bofedales of the Peruvian High Andes, *Mires and Peat*, 15, 2014.
- Fritz, C., Pancotto, V. A., Elzenga, J. T. M., Visser, E. J. W., Grootjans, A. P., Pol, A., Iturraspe, R., Roelofs, J. G. M., and Smolders, A. J. P.: Zero methane emission bogs: extreme rhizosphere oxygenation by cushion plants in Patagonia, *New Phytol*, 190, 398-408, 2011.
- Fritz, C.: Limits of Sphagnum bog growth in the New World: Biochemistry and ecohydrology of peatlands in South America and New Zealand, Ph.D thesis, Radboud University of Nijmegen / University of Groningen, Netherlands, 193 pp., 2012.
- Gibson, N., and Kirkpatrick, J. B.: A Comparison of the Cushion Plant-Communities of New-Zealand and Tasmania, *New Zeal J Bot*, 23, 549-566, 1985.

No Comments.

- Goodrich, J. P., Campbell, D. I., Roulet, N. T., Clearwater, M. J., and Schipper, L. A.: Overriding control of methane flux temporal variability by water table dynamics in a Southern Hemisphere, raised bog, *Journal of Geophysical Research: Biogeosciences*, 120, 819-831, 2015.
- 5 Gorham, E.: Northern Peatlands: Role in the Carbon Cycle and Probable Responses to Climatic Warming, *Ecol Appl*, 1, 182-195, 1991.
- Grootjans, J., Iturraspe, R., Fritz, C., Moen, A., and Joosten, H.: Mires and mire types of Peninsula Mitre, Tierra del Fuego, Argentina, *Mires and Peat*, 14, 1-20, 2014.
- Hamilton, J. D., Kelly, C. A., Rudd, J. W. M., Hesslein, R. H., and Roulet, N. T.: Flux to the atmosphere of CH<sub>4</sub> and CO<sub>2</sub> from wetland ponds on the Hudson Bay lowlands (HBLs), *Journal of Geophysical Research: Atmospheres*, 99, 1495-1510, 10 1994.
- Heimann, A., Jakobsen, R., and Blodau, C.: Energetic Constraints on H<sub>2</sub>-Dependent Terminal Electron Accepting Processes in Anoxic Environments: A Review of Observations and Model Approaches, *Environ Sci Technol*, 44, 24-33, 2010.
- Heusser, C. J.: Paleocology of a Donatia-Astelia Cushion Bog, Magellanic Moorland-Sub-Antarctic Evergreen Forest Transition, Southern Tierra-Del-Fuego, Argentina, *Rev Palaeobot Palyno*, 89, 429-440, 1995.
- 15 Hope, G. S.: Peat in the mountains of New Guinea, *Mires and Peat*, 15, 2014.
- Hornibrook, E. R. C., Longstaffe, F. J., and Fyfe, W. S.: Spatial distribution of microbial methane production pathways in temperate zone wetland soils: Stable carbon and hydrogen isotope evidence, *Geochim Cosmochim Acta*, 61, 745-753, 1997.
- Hornibrook, E. R. C., Longstaffe, F. J., and Fyfe, W. S.: Evolution of stable carbon isotope compositions for methane and carbon dioxide in freshwater wetlands and other anaerobic environments, *Geochim Cosmochim Acta*, 64, 1013-1027, 2000.
- 20 IPCC: Anthropogenic and Natural Radiative Forcing, in: *Climate Change 2013 – The Physical Science Basis: Working Group I Contribution to the Fifth Assessment Report of the Intergovernmental Panel on Climate Change*, edited by: Change, I. P. o. C., Cambridge University Press, Cambridge, 659-740, 2014.
- Iturraspe, R.: Spatial analysis and description of eastern peatlands of Tierra del Fuego, Argentina, in: *Mires from pole to pole*, edited by: Lindholm, T., and Heikkilä, R., Finnish Environment Institute (SYKE), Helsinki, Finland, 2012.
- 25 Jackowicz-Korczyński, M., Christensen, T. R., Bäckstrand, K., Crill, P., Friborg, T., Mastepanov, M., and Ström, L.: Annual cycle of methane emission from a subarctic peatland, *Journal of Geophysical Research: Biogeosciences*, 115, n/a-n/a, 2010.
- Joabsson, A., Christensen, T. R., and Wallén, B.: Vascular plant controls on methane emissions from northern peatforming wetlands, *Trends in Ecology & Evolution*, 14, 385-388, 1999.
- Kip, N., Fritz, C., Langelaan, E. S., Pan, Y., Bodrossy, L., Pancotto, V., Jetten, M. S. M., Smolders, A. J. P., and den Camp, H. J. M. O.: Methanotrophic activity and diversity in different *Sphagnum magellanicum* dominated habitats in the southernmost peat bogs of Patagonia, *Biogeosciences*, 9, 47-55, 2012.
- 30 Kleinebecker, T., Hölzel, N., and Vogel, A.: Gradients of continentality and moisture in South Patagonian ombrotrophic peatland vegetation, *Folia Geobot*, 42, 363-382, 2007.

No Comments.

- Kleinebecker, T., Hölzel, N., and Vogel, A.: South Patagonian ombrotrophic bog vegetation reflects biogeochemical gradients at the landscape level, *J Veg Sci*, 19, 151-160, 2008.
- Knoblauch, C., Spott, O., Evgrafova, S., Kutzbach, L., and Pfeiffer, E.-M.: Regulation of methane production, oxidation, and emission by vascular plants and bryophytes in ponds of the northeast Siberian polygonal tundra, *Journal of Geophysical Research: Biogeosciences*, 120, 2525-2541, 2015.
- Knorr, K. H., Glaser, B., and Blodau, C.: Fluxes and  $^{13}\text{C}$  isotopic composition of dissolved carbon and pathways of methanogenesis in a fen soil exposed to experimental drought, *Biogeosciences*, 5, 1457-1473, 2008a.
- Knorr, K. H., Oosterwoud, M. R., and Blodau, C.: Experimental drought alters rates of soil respiration and methanogenesis but not carbon exchange in soil of a temperate fen, *Soil Biol Biochem*, 40, 1781-1791, 2008b.
- Knorr, K.-H., Lischeid, G., and Blodau, C.: Dynamics of redox processes in a minerotrophic fen exposed to a water table manipulation, *Geoderma*, 153, 379-392, 2009.
- Knorr, K.-H., Horn, M. A., and Borken, W.: Significant nonsymbiotic nitrogen fixation in Patagonian ombrotrophic bogs, *Global Change Biol*, 21, 2357-2365, 2015.
- Kutzbach, L., Schneider, J., Sachs, T., Giebels, M., Nykanen, H., Shurpali, N. J., Martikainen, P. J., Alm, J., and Wilmking, M.:  $\text{CO}_2$  flux determination by closed-chamber methods can be seriously biased by inappropriate application of linear regression, *Biogeosciences*, 4, 1005-1025, 2007.
- Laine, A., Wilson, D., Kiely, G., and Byrne, K. A.: Methane flux dynamics in an Irish lowland blanket bog, *Plant Soil*, 299, 181-193, 2007.
- Lehmann, J., Münchberger, W., Knoth, C., Blodau, C., Nieberding, F., Prinz, T., Pancotto, V., and Kleinebecker, T.: High-Resolution Classification of South Patagonian Peat Bog Microforms Reveals Potential Gaps in Up-Scaled  $\text{CH}_4$  Fluxes by use of Unmanned Aerial System (UAS) and CIR Imagery, *Remote Sens-Basel*, 8, 173, 2016.
- Limpens, J., Berendse, F., Blodau, C., Canadell, J. G., Freeman, C., Holden, J., Roulet, N., Rydin, H., and Schaepman-Strub, G.: Peatlands and the carbon cycle: from local processes to global implications - a synthesis, *Biogeosciences*, 5, 1475-1491, 2008.
- Mainiero, R., and Kazda, M.: Effects of *Carex rostrata* on soil oxygen in relation to soil moisture, *Plant Soil*, 270, 311-320, 2005.
- Mikaloff Fletcher, S. E., Tans, P. P., Bruhwiler, L. M., Miller, J. B., and Heimann, M.:  $\text{CH}_4$  sources estimated from atmospheric observations of  $\text{CH}_4$  and its  $^{13}\text{C}/^{12}\text{C}$  isotopic ratios: 1. Inverse modeling of source processes, *Global Biogeochem Cy*, 18, 2004.
- Paredes, N. I., Consolo, V. F., Pancotto, V. A., Fritz, C., Barrera, M. D., Arambarri, A. M., and Salerno, G. L.: Microfungal composition in an *Astelia-Donatia* cushion peatland in Tierra del Fuego, Argentina. , *Darwinia*, 2, 2014.
- Pelletier, L., Strachan, I. B., Garneau, M., and Roulet, N. T.: Carbon release from boreal peatland open water pools: Implication for the contemporary C exchange, *Journal of Geophysical Research: Biogeosciences*, 119, 207-222, 2014.

No Comments.

- Popp, T. J., Chanton, J. P., Whiting, G. J., and Grant, N.: Methane stable isotope distribution at a Carex dominated fen in north central Alberta, *Global Biogeochem Cy*, 13, 1063-1077, 1999.
- Rinne, J., Riutta, T., Pihlatie, M., Aurela, M., Haapanala, S., Tuovinen, J.-P., Tuittila, E.-S., and Vesala, T.: Annual cycle of methane emission from a boreal fen measured by the eddy covariance technique, *Tellus B*, 59, 449-457, 2007.
- 5 Ruthsatz, B., and Villagran, C.: Vegetation Pattern and Soil Nutrients of a Magellanic Moorland on the Cordillera-De-Piuchue, Chiloe Island, Chile, *Rev Chil Hist Nat*, 64, 461-478, 1991.
- Sander, R.: Compilation of Henry's Law constants for inorganic and organic species of potential importance in environmental chemistry. Max Planck Institute of Chemistry, Mainz, Germany, available at: <http://www.henrys-law.org/henry-3.0.pdf> (last access: 1 June 2017), 1999
- 10 Schmidt, S. R., Kleinebecker, T., Vogel, A., and Holzel, N.: Interspecific and geographical differences of plant tissue nutrient concentrations along an environmental gradient in Southern Patagonia, Chile, *Aquat Bot*, 92, 149-156, 2010.
- Steinmann, P., Eilrich, B., Leuenberger, M., and Burns, S. J.: Stable carbon isotope composition and concentrations of CO<sub>2</sub> and CH<sub>4</sub> in the deep catotelm of a peat bog, *Geochim Cosmochim Ac*, 72, 6015-6026, 2008.
- Stumm, W., and Morgan, J. J.: Aquatic chemistry. Chemical Equilibria and Rates in Natural Waters, 3rd ed., Wiley, Hoboken, N.J., USA, 1996.
- 15 von Mering, S.: Tetroncium and its only species, *T. magellanicum* (Juncaginaceae): distribution, ecology and lectotypification, *Willdenowia*, 43, 13-24, 2013.
- Whalen, S. C.: Biogeochemistry of Methane Exchange between Natural Wetlands and the Atmosphere, *Environmental Engineering Science*, 22, 73-94, 2005.
- 20 Whiticar, M. J., Faber, E., and Schoell, M.: Biogenic methane formation in marine and freshwater environments: CO<sub>2</sub> reduction vs. acetate fermentation—Isotope evidence, *Geochim Cosmochim Ac*, 50, 693-709, 1986.
- Yu, Z. C.: Northern peatland carbon stocks and dynamics: a review, *Biogeosciences*, 9, 4071-4085, 2012.

No Comments.



## Figures

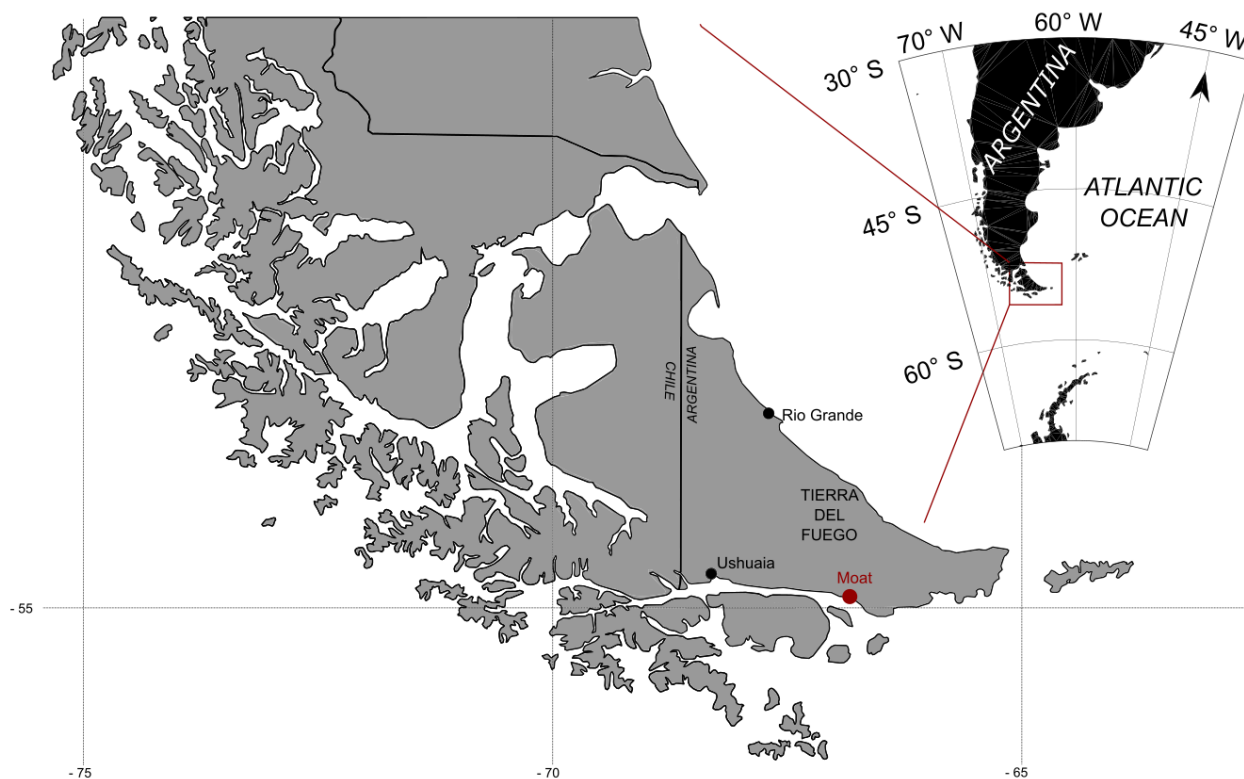

**Figure 1.** Location of the study area in southernmost Patagonia. The investigated cushion bog in Moat is located 130 km eastern of Ushuaia (Argentina). The map was created at <http://www.simplemapp.com> accessed on 11.12.2017 and in Matlab 5 (MATLAB Mapping Toolbox Release R2017a).

No Comments.

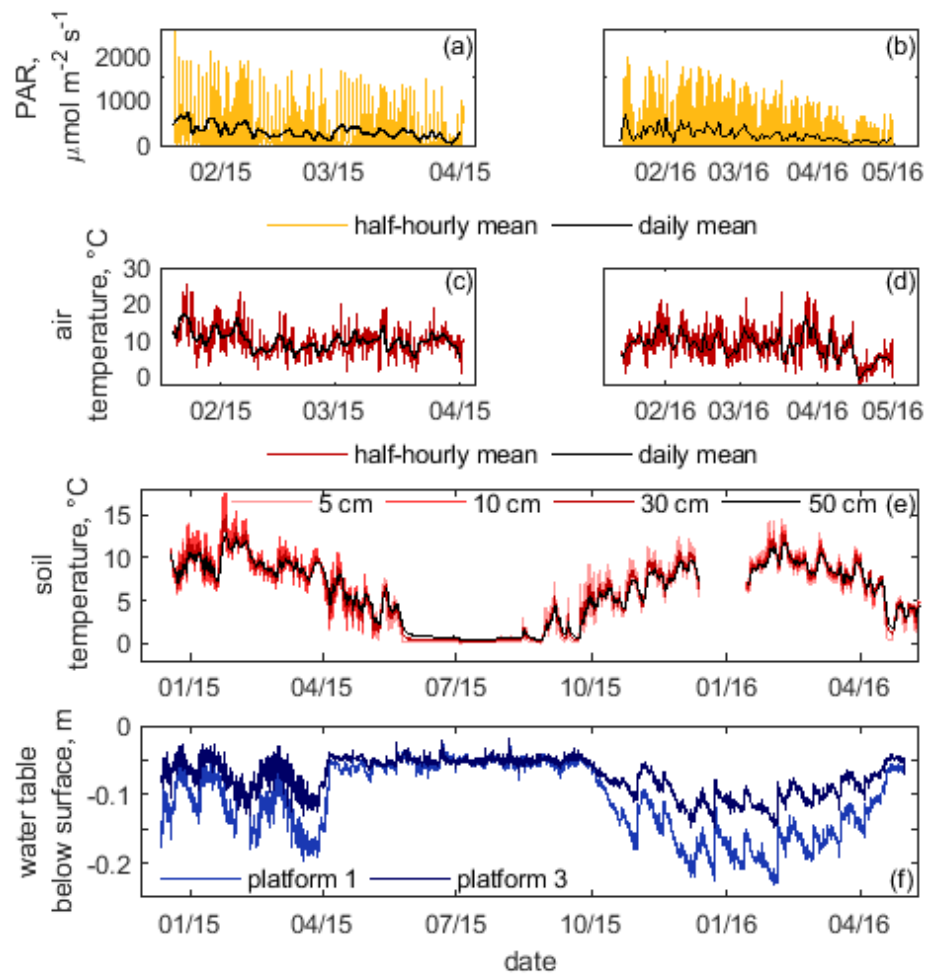

**Figure 2.** Time series of environmental variables during the study period. Photosynthetic active radiation (PAR, a, b) and air temperature (c, d) are presented as half-hourly and daily means during two austral summer periods. Soil temperature (e) and 1 water table position below surface (f) were continuously recorded and are shown as half-hourly means. Note the difference in response time between platform 1 and 2 where water table fluctuations were recorded.

---

 Number: 1 Author: Subject: Highlight Date: 2018-09-24 12:17:03

---

 Number: 2 Author: Subject: Highlight Date: 2018-09-24 12:18:16

---

On the figure (f), platform 3 instead platform 2 is denoted. Check!

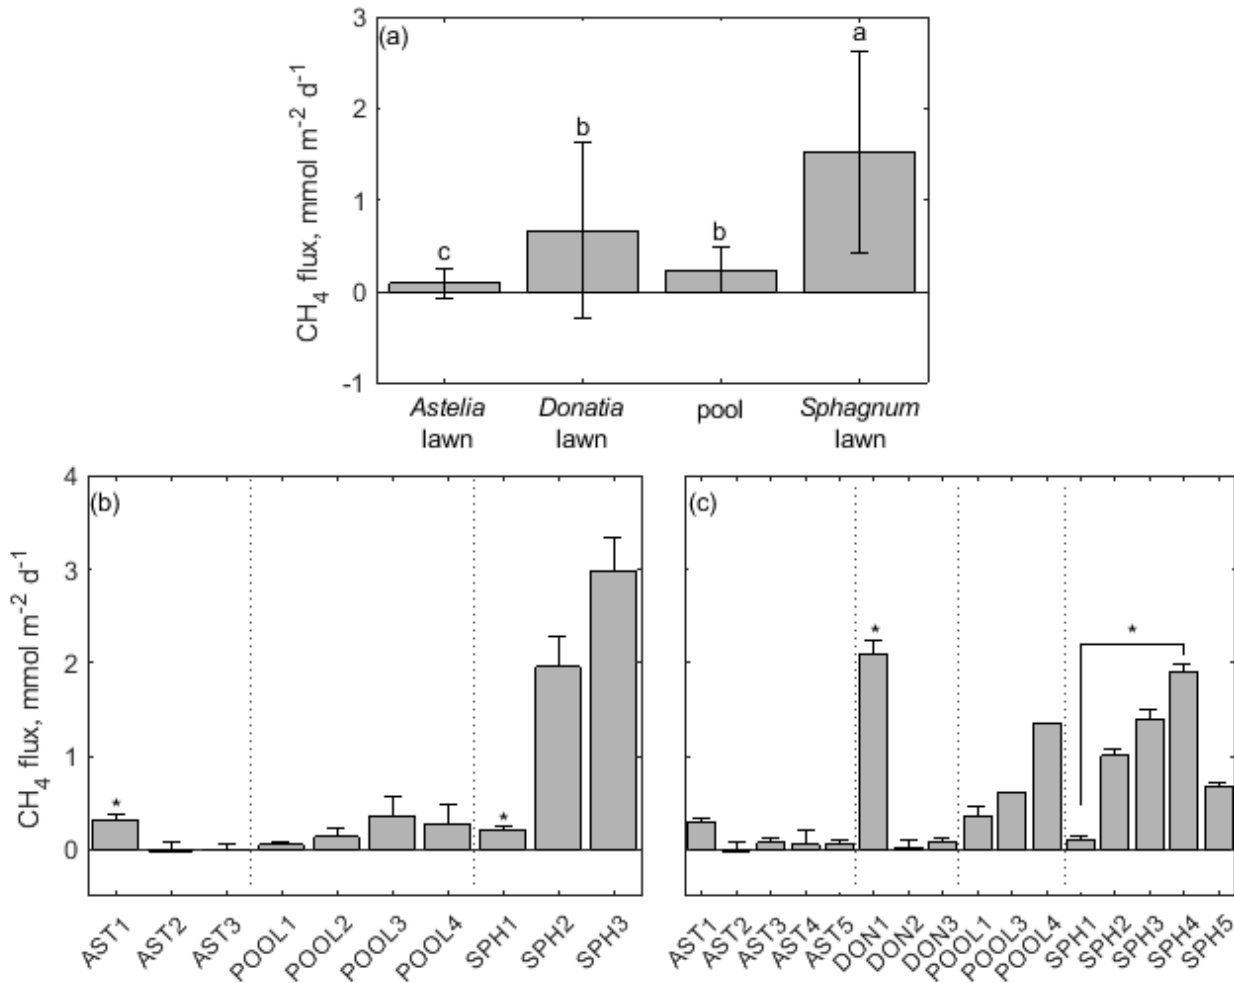

**Figure 3 a-c.** Mean CH<sub>4</sub> emissions and their standard deviation determined from dominant microforms (a) and individual collars during the two measurement campaigns (b, c) in a Patagonian cushion bog. Different letter superscripts denote significantly different amounts of emitted CH<sub>4</sub> between microforms despite variability within microforms was substantial (a) or from collars within one microform (b, c) that were identified by Kruskal-Wallis analysis of variance and multiple comparison U-tests.

No Comments.

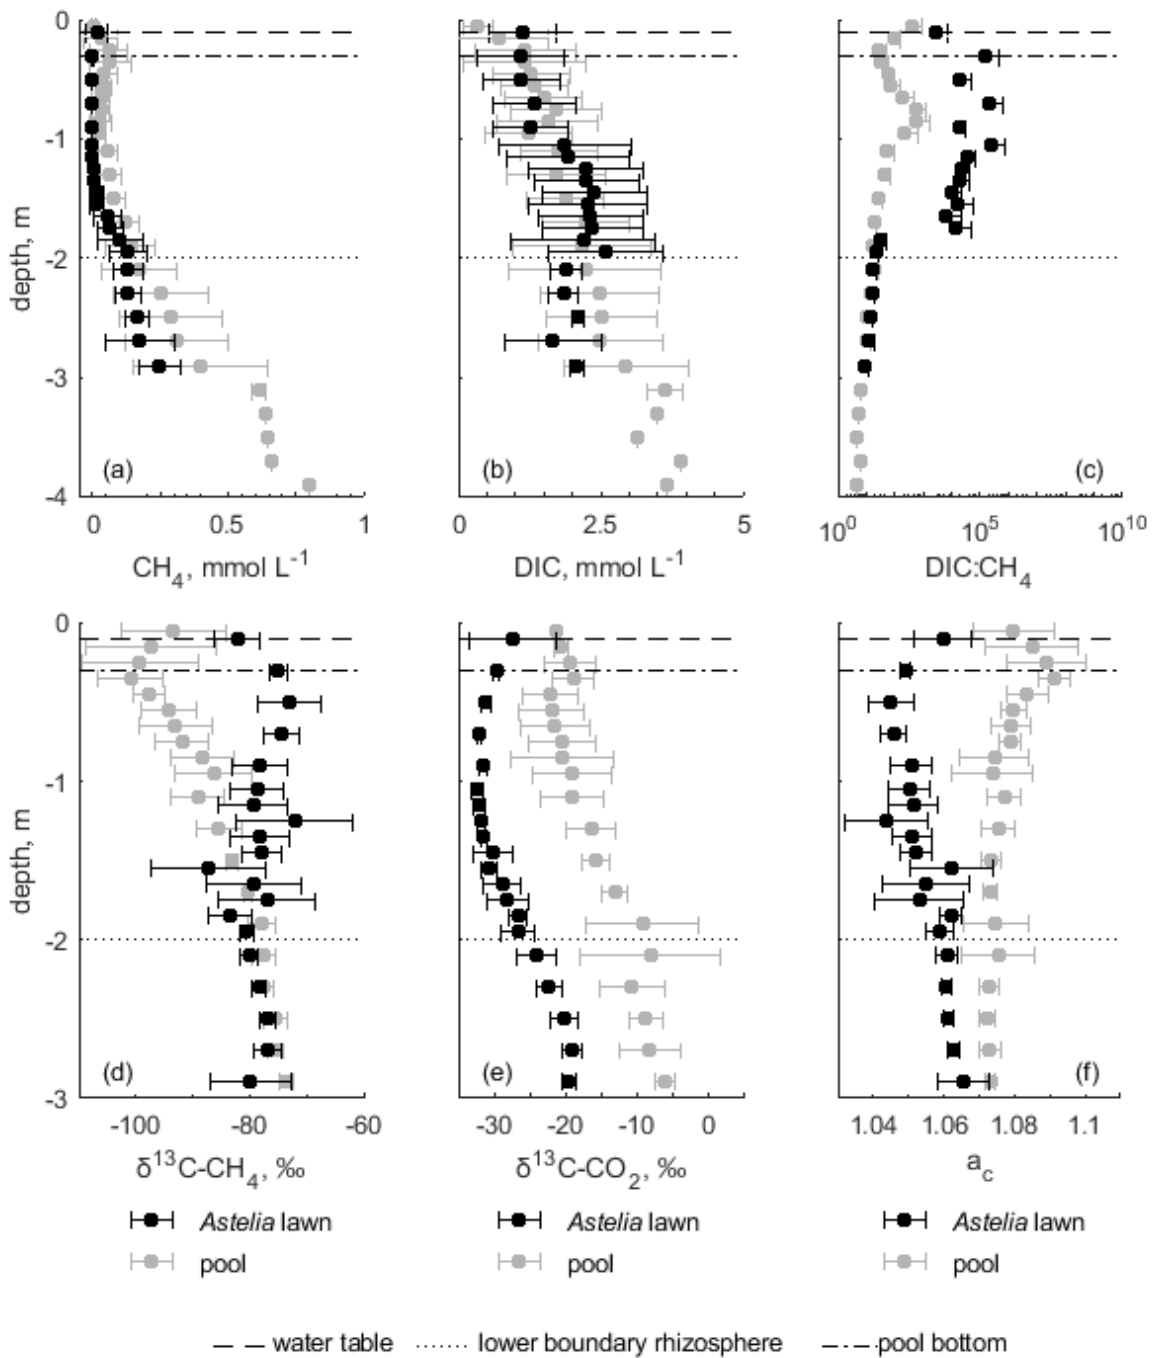

**Figure 4 a-f.** Pore water composition in depth profiles obtained from MLPS (N = 3) installed in *Astelia* lawns and pools during two sampling campaigns in austral summer 2015 and 2016. Mean values and their standard deviation are presented. CH<sub>4</sub> (a) and DIC (b) concentrations as well as related DIC:CH<sub>4</sub> (c) ratios were determined during both sampling events while carbon isotope values of CH<sub>4</sub> (d) and DIC (e) and corresponding fractionation factors (f) were investigated only during the second

No Comments.



campaign. DIC:CH<sub>4</sub> ratios are shown on a logarithmic scale without negative standard deviation for *Astelia* lawns and pools. Displayed depths represent the centre of a MLP segment and had to be standardized because of different sampling resolution in both years. The water table position and approximate maximum rooting depth (rhizosphere) refer to *Astelia* lawns only. Note the different scale of the y-axis in the upper and lower three panels.

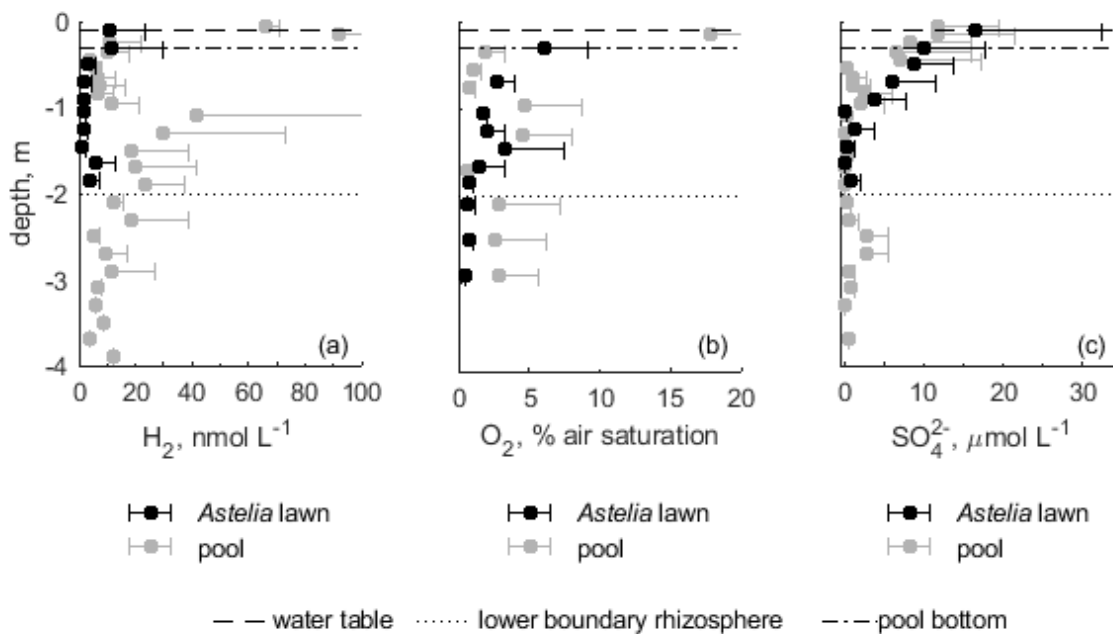

5

**Figure 5 a-c.** Profiles of H<sub>2</sub> (a), O<sub>2</sub> (b) and sulfate (c) pore water concentrations obtained from MLPs (N = 3) installed in *Astelia* lawns and pools during two sampling campaigns in austral summer 2015 and 2016. Mean values and their standard deviation are presented. Displayed depths represent the centre of a MLP segment and had to be standardized because of different sampling resolution in both years. The water table position and approximate maximum rooting depth (rhizosphere) refer to *Astelia* lawns only.

10

No Comments.

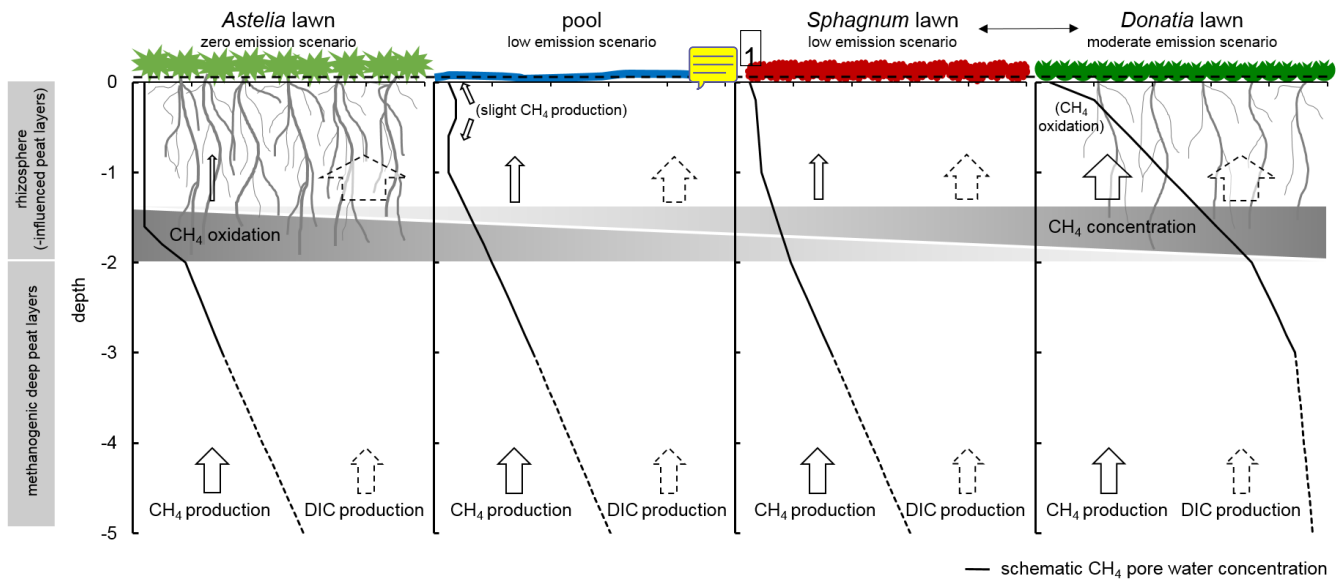

**Figure 6.** Schematic CH<sub>4</sub> concentration profiles below the four dominant microforms in a Patagonian cushion bog. The shape of profiles was derived from data obtained in the present study together with those by Limpens et al. (2008), Fritz et al. (2011) and Broder et al. (2015). The size of arrows represents the relative magnitude of either a CH<sub>4</sub> or CO<sub>2</sub> flux following the diffusion gradient. The water table position is displayed by a dashed line near the surface. CH<sub>4</sub> oxidation by root O<sub>2</sub> release resulted in near-zero CH<sub>4</sub> pore water concentrations in densely rooted peat below *Astelia* lawns. With increasing distance from densely rooted peat, CH<sub>4</sub> oxidation decreased while CH<sub>4</sub> concentration increased until reaching a depth profile typical for those northern peatlands with less if any roots in water-saturated peat layers. Exemplary sequence of microforms, derived from observed amounts of emitted CH<sub>4</sub>. Other sequences of microforms are reasonable as microforms occur in various combinations in the field.

---

 Number: 1 Author: Subject: Note Date: 2018-09-24 16:42:36

It was discussed a lot about lateral flows, which how, are not reflected in this conceptual diagram. It is also not clear if the site has elevation/slope property. In such a case, please demonstrate the respective relationships.

## Tables

Table 1. Characteristic plant species of dominant microforms in a Patagonian cushion bog. Species composition was determined during the second measurement campaign within collars where closed chamber measurements were conducted. Mean cover (%) and its standard deviation of characteristic were given and plant species with a mean cover < 5 % were listed

5 with +.

| species                        | microform           |                      |                     |
|--------------------------------|---------------------|----------------------|---------------------|
|                                | <i>Astelia</i> lawn | <i>Sphagnum</i> lawn | <i>Donatia</i> lawn |
| <i>Astelia pumila</i>          | 84 ± 16             |                      |                     |
| <i>Donatia fascicularis</i>    | 8 ± 10              | +                    | 90 ± 9              |
| <i>Sphagnum magellanicum</i>   |                     | 94 ± 4               |                     |
| <i>Tetroncium magellanicum</i> | +                   | 7 ± 2                | +                   |
| <i>Caltha dioneifolia</i>      | +                   | +                    | 6 ± 5               |
| <i>Empetrum rubrum</i>         | +                   |                      |                     |
| <i>Gaultheria antarctica</i>   | +                   | +                    | +                   |
| <i>Myrteola nummularia</i>     | +                   |                      |                     |

No Comments.

Table 2. CH<sub>4</sub> fluxes determined from individual collars installed in dominant microforms of a Patagonian cushion bog. Number of flux measurements, their mean and standard deviation are presented. Significantly different fluxes from collars within one microform were identified by Kruskal-Wallis analysis of variance and multiple comparison U-tests with Bonferroni adjustment. Results of computing Spearman's rank correlation coefficient rho for the relationships between CH<sub>4</sub> fluxes and possible environmental controls, namely water table depth determined separately for each collar and soil temperature in 0.05 m depth, are given. Furthermore, characteristics of collars and results of computing Spearman's rank correlation for the relationships between mean CH<sub>4</sub> fluxes during the second campaign and each feature are shown. Microform size refers to the extent of a microform in which a specific collar was installed. P-values < 0.05 indicate a correlation significantly different from zero.

10

No Comments.



| year                 | micro-form           | Kruskal-Wallis analysis |                                                                 |              | water table depth, m |       | soil temperature, °C |       | presence <i>T. magellanicum</i> |      |                   | presence <i>D. fascicularis</i> |     |                    | microform size       |       |       |      |
|----------------------|----------------------|-------------------------|-----------------------------------------------------------------|--------------|----------------------|-------|----------------------|-------|---------------------------------|------|-------------------|---------------------------------|-----|--------------------|----------------------|-------|-------|------|
|                      |                      | N                       | mean flux, mmol CH <sub>4</sub> m <sup>-2</sup> d <sup>-1</sup> | p            | rho                  | p     | rho                  | p     | number of shoots                | rho  | p                 | cover, %                        | rho | p                  | size, m <sup>2</sup> | rho   | p     |      |
| 2015                 | <i>Astelia</i> lawn  | 1                       | 60                                                              | 0.32 ± 0.05  | < 0.05               | -0.22 | n.s.                 | n.d.  | n.d.                            |      |                   |                                 |     |                    |                      |       |       |      |
|                      |                      | 2                       | 64                                                              | -0.02 ± 0.09 | n.s.                 | -0.21 | n.s.                 | 0.17  | n.s.                            |      |                   |                                 |     |                    |                      |       |       |      |
|                      |                      | 3                       | 55                                                              | -0.01 ± 0.07 | n.s.                 | 0.03  | n.s.                 | -0.08 | n.s.                            |      |                   |                                 |     |                    |                      |       |       |      |
|                      | <i>Sphagnum</i> lawn | 1                       | 62                                                              | 0.21 ± 0.05  | < 0.05               | -0.21 | n.s.                 | n.d.  | n.d.                            |      |                   |                                 |     |                    |                      |       |       |      |
|                      |                      | 2                       | 64                                                              | 1.96 ± 0.33  | n.s.                 | 0.41  | < 0.05               | 0.52  | < 0.05                          |      |                   |                                 |     |                    |                      |       |       |      |
|                      |                      | 3                       | 54                                                              | 2.99 ± 0.35  | n.s.                 | 0.2   | n.s.                 | 0.6   | < 0.05                          |      |                   |                                 |     |                    |                      |       |       |      |
|                      | pool                 | 1                       | 13                                                              | 0.05 ± 0.03  | n.s.                 |       |                      | n.d.  | n.d.                            |      |                   |                                 |     |                    |                      |       |       |      |
|                      |                      | 2                       | 12                                                              | 0.14 ± 0.08  | n.s.                 |       |                      | 0.4   | n.s.                            |      |                   |                                 |     |                    |                      |       |       |      |
|                      |                      | 3                       | 10                                                              | 0.36 ± 0.2   | n.s.                 |       |                      | 0.64  | < 0.05                          |      |                   |                                 |     |                    |                      |       |       |      |
|                      |                      | 4                       | 11                                                              | 0.28 ± 0.2   | n.s.                 |       |                      | -0.01 | n.s.                            |      |                   |                                 |     |                    |                      |       |       |      |
|                      | 2016                 | <i>Astelia</i> lawn     | 1                                                               | 7            | 0.29 ± 0.04          | n.s.  | 0.27                 | n.s.  | -0.13                           | n.s. | 15                |                                 | 25  |                    |                      | 1.12  |       |      |
|                      |                      |                         | 2                                                               | 11           | -0.02 ± 0.1          | n.s.  | -0.22                | n.s.  | -0.16                           | n.s. | 0                 |                                 | 4   |                    |                      | 4.45  |       |      |
| 3                    |                      |                         | 8                                                               | 0.07 ± 0.05  | n.s.                 | -0.68 | n.s.                 | -0.31 | n.s.                            | 0    | 0.67 <sup>a</sup> | n.s.                            | 0   | 0.01               | n.s.                 | 26.66 | -0.10 | n.s. |
| 4                    |                      |                         | 11                                                              | 0.06 ± 0.15  | n.s.                 | -0.09 | n.s.                 | 0.13  | n.s.                            | 0    |                   |                                 | 8   |                    |                      | 3.38  |       |      |
| 5                    |                      |                         | 11                                                              | 0.06 ± 0.04  | n.s.                 | -0.44 | n.s.                 | 0.14  | n.s.                            | 6    |                   |                                 | 2   |                    |                      | 4.55  |       |      |
| <i>Donatia</i> lawn  |                      | 1                       | 9                                                               | 2.1 ± 0.14   | < 0.05               | -0.82 | < 0.05               | 0.74  | < 0.05                          | 30   |                   |                                 | 80  |                    |                      | 0.26  |       |      |
|                      |                      | 2                       | 11                                                              | 0.01 ± 0.09  | n.s.                 | 0.29  | n.s.                 | -0.64 | < 0.05                          | 9    | 1.00 <sup>a</sup> | n.s.                            | 97  | -1.00 <sup>a</sup> | n.s.                 | 0.15  | 0.50  | n.s. |
|                      |                      | 3                       | 10                                                              | 0.08 ± 0.04  | n.s.                 | -0.46 | n.s.                 | -0.2  | n.s.                            | 18   |                   |                                 | 92  |                    |                      | 0.96  |       |      |
| <i>Sphagnum</i> lawn |                      | 1                       | 9                                                               | 0.09 ± 0.05  | < 0.05               | 0.68  | n.s.                 | -0.78 | < 0.05                          | 66   |                   |                                 | 0   |                    |                      | 0.43  |       |      |
|                      |                      | 2                       | 11                                                              | 1.01 ± 0.06  | n.s.                 | 0.15  | n.s.                 | -0.42 | n.s.                            | 165  | 0.40              | n.s.                            | 0   | 0.71 <sup>a</sup>  | n.s.                 | 2.38  | 0.00  | n.s. |

No Comments.

|      |   |    |                 |        |       |      |       |      |     |   |      |
|------|---|----|-----------------|--------|-------|------|-------|------|-----|---|------|
|      | 3 | 11 | $1.39 \pm 0.1$  | n.s.   | -0.05 | n.s. | -0.05 | n.s. | 175 | 0 | 2.7  |
|      | 4 | 9  | $1.9 \pm 0.08$  | < 0.05 | -0.44 | n.s. | 0.25  | n.s. | 108 | 4 | 0.38 |
|      | 5 | 10 | $0.68 \pm 0.03$ | n.s.   | 0.17  | n.s. | -0.22 | n.s. | 120 | 0 | 0.65 |
| pool | 1 | 2  | $0.35 \pm 0.11$ | n.s.   |       |      | n.d.  | n.d. |     |   |      |
|      | 3 | 1  | $0.6 \pm 0$     | n.s.   |       |      | n.d.  | n.d. |     |   |      |
|      | 4 | 1  | $1.35 \pm 0$    | n.s.   |       |      | n.d.  | n.d. |     |   |      |

n.s. = not significant, n.d. = not determined, <sup>a</sup> = despite a (relative) high absolute value of Spearman's rho, p-values did not indicate a significant correlation, probably because of outliers.

No Comments.

Table 3. Summary of peat characteristics obtained from two peat cores taken in *Astelia* lawns in a Patagonian cushion bog. Data were averaged over the respective depths sampled in 0.1 m resolution.

| peat characteristics                                                                                                                                  | depth, m | bulk density,<br>g cm <sup>-3</sup> | N, % | C, %  | CN    | δ <sup>15</sup> N | δ <sup>13</sup> C |
|-------------------------------------------------------------------------------------------------------------------------------------------------------|----------|-------------------------------------|------|-------|-------|-------------------|-------------------|
| amorphous, highly decomposed cushion peat with many living <i>Astelia</i> roots, only close to the surface (0-0.4 m) with recognizable plant material | 0-1      | 0.03                                | 1.40 | 50.38 | 35.99 | -1.20             | -25.65            |
|                                                                                                                                                       | 1-2      | 0.06                                | 1.79 | 50.24 | 28.07 | 1.19              | -26.18            |
| <i>Sphagnum</i> peat, with depth increasingly amorphous and decomposed                                                                                | 2-3      | 0.06                                | 1.50 | 50.79 | 33.86 | 1.12              | -26.33            |
|                                                                                                                                                       | 3-4      | 0.06                                | 1.22 | 50.66 | 41.52 | 0.62              | -24.55            |
|                                                                                                                                                       | 4-5      | 0.11                                | 1.17 | 50.51 | 43.17 | -1.68             | -26.43            |
|                                                                                                                                                       | 5-6      | 0.10                                | 1.18 | 50.52 | 42.81 | -1.78             | -26.77            |
|                                                                                                                                                       | 6-7      | 0.15                                | 1.28 | 52.92 | 41.34 | -2.42             | -27.08            |

No Comments.
